# Supplementary material for: Is there a link between aging and microbiome diversity in exceptional mammalian longevity?
Source: PeerJ journal article supplement (doi:10.7717/peerj.4174), 2018-01-08

### Age Dataset 1

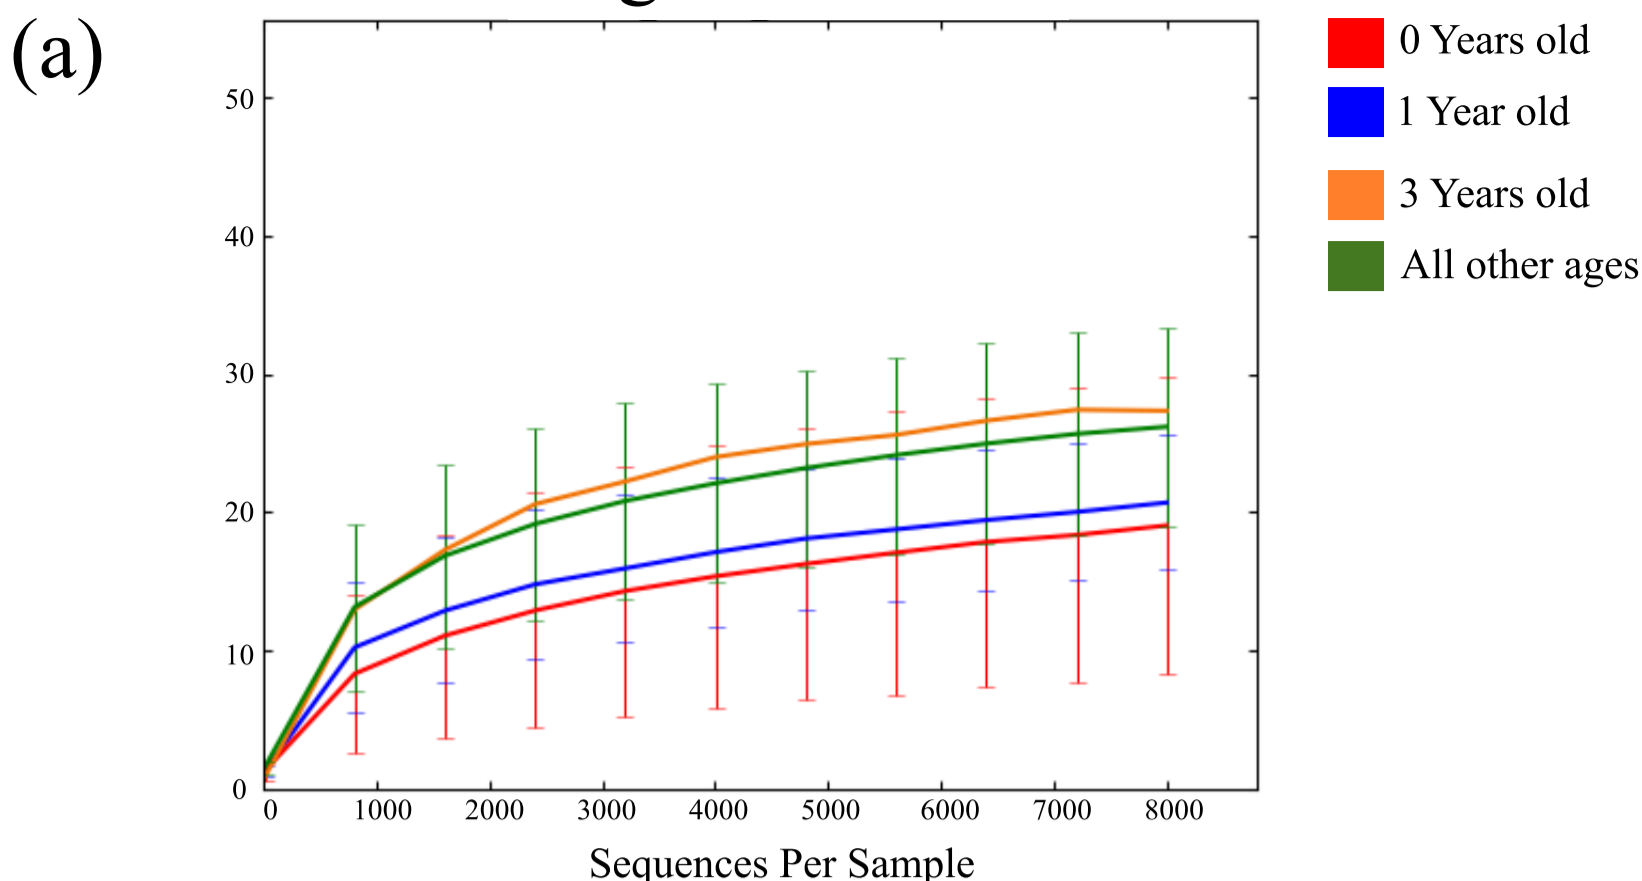

### Age Dataset 3

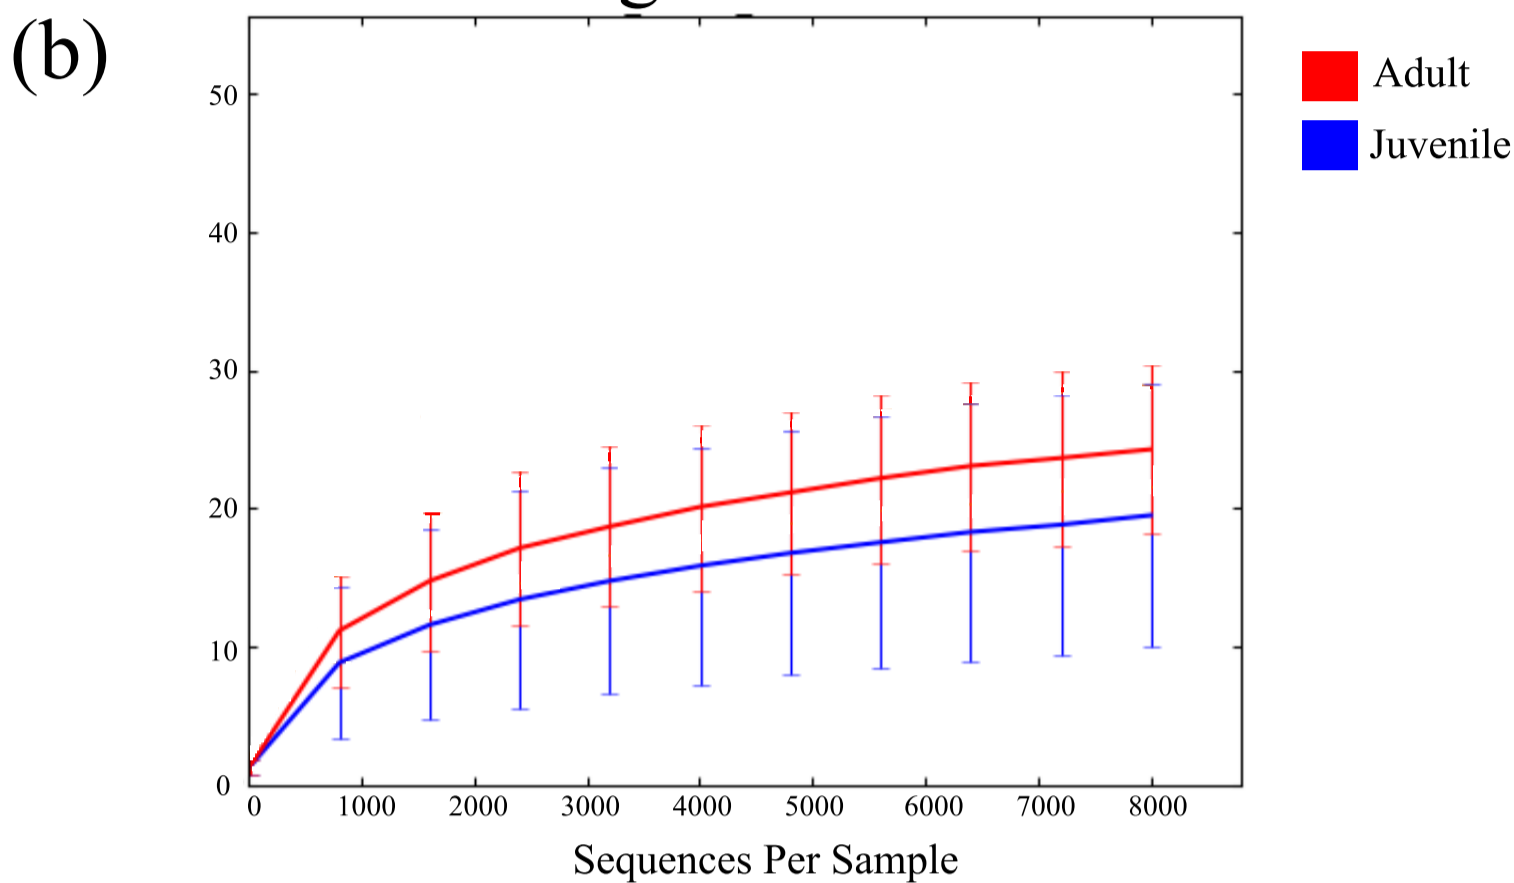

### Age Dataset 4

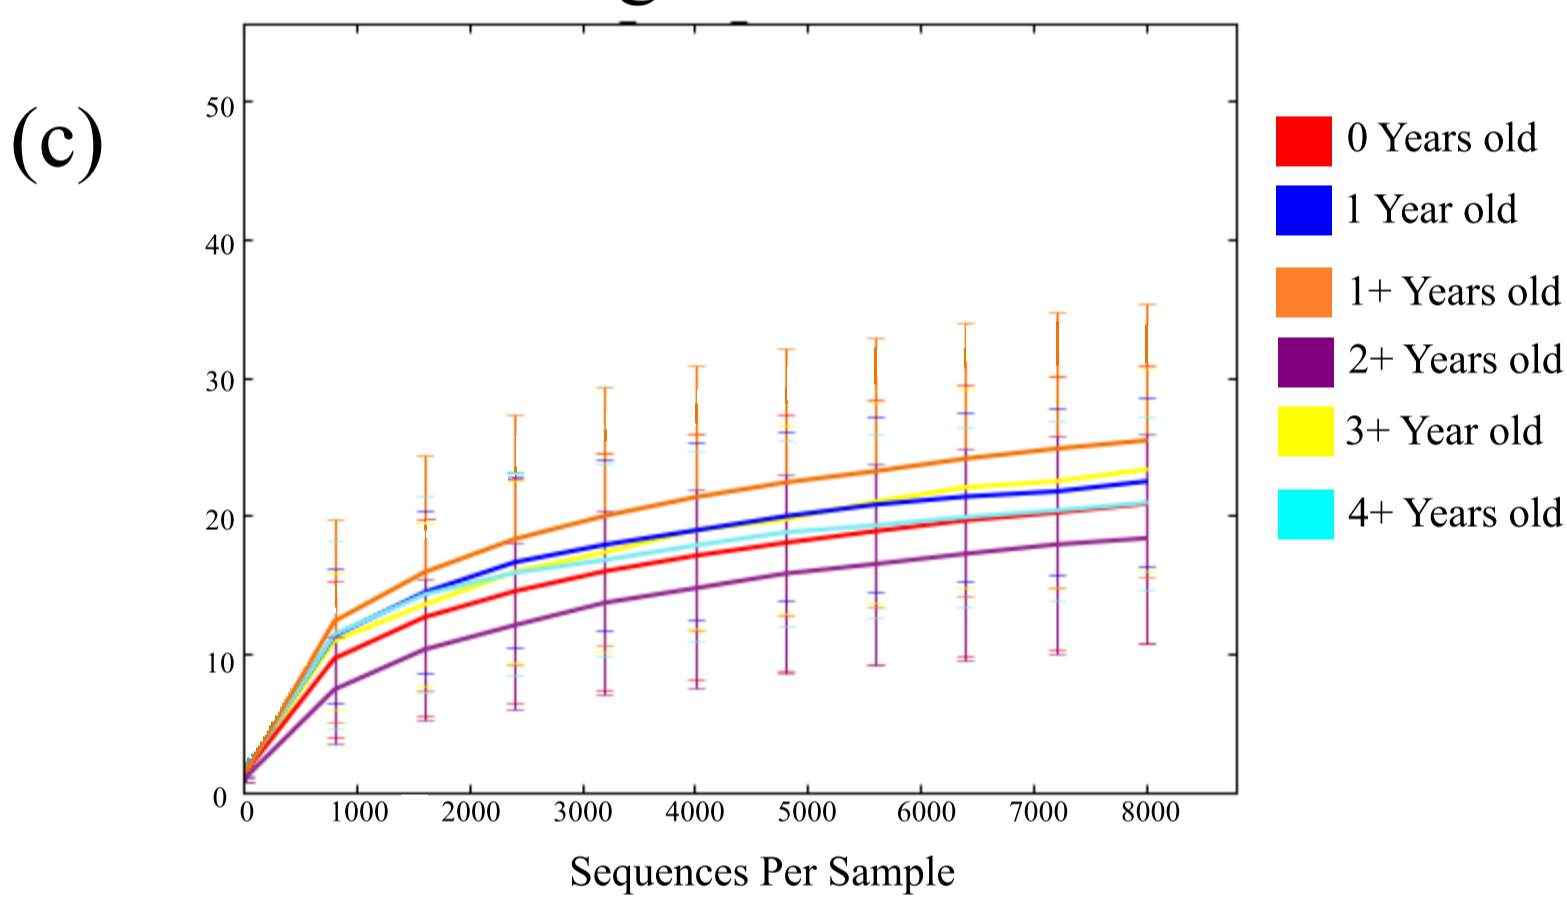

### Site

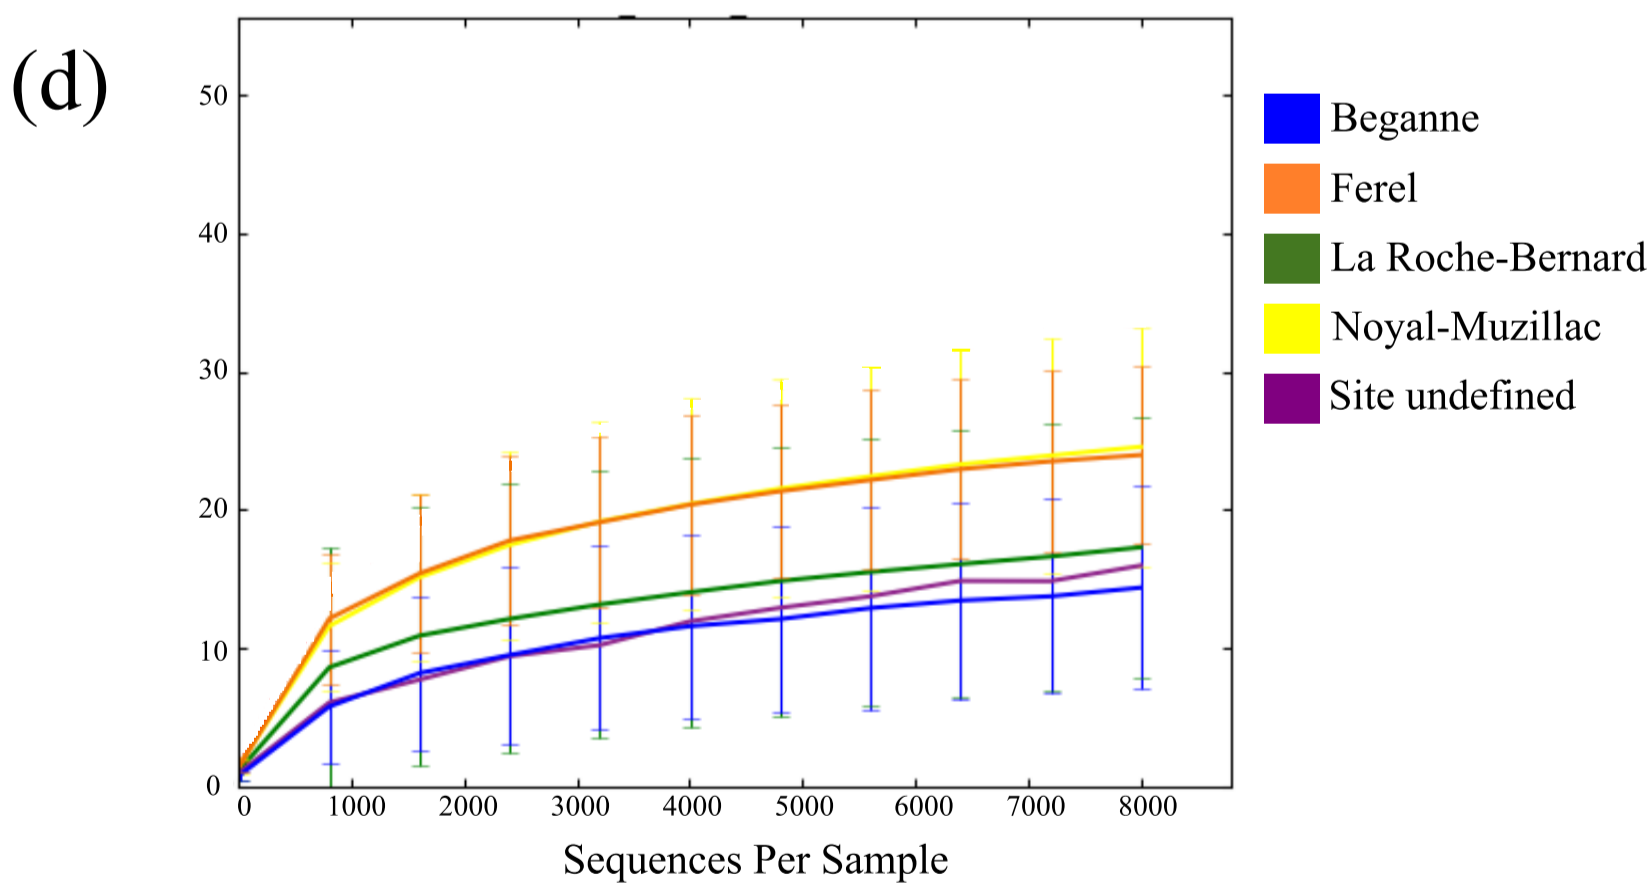

### Sample ID

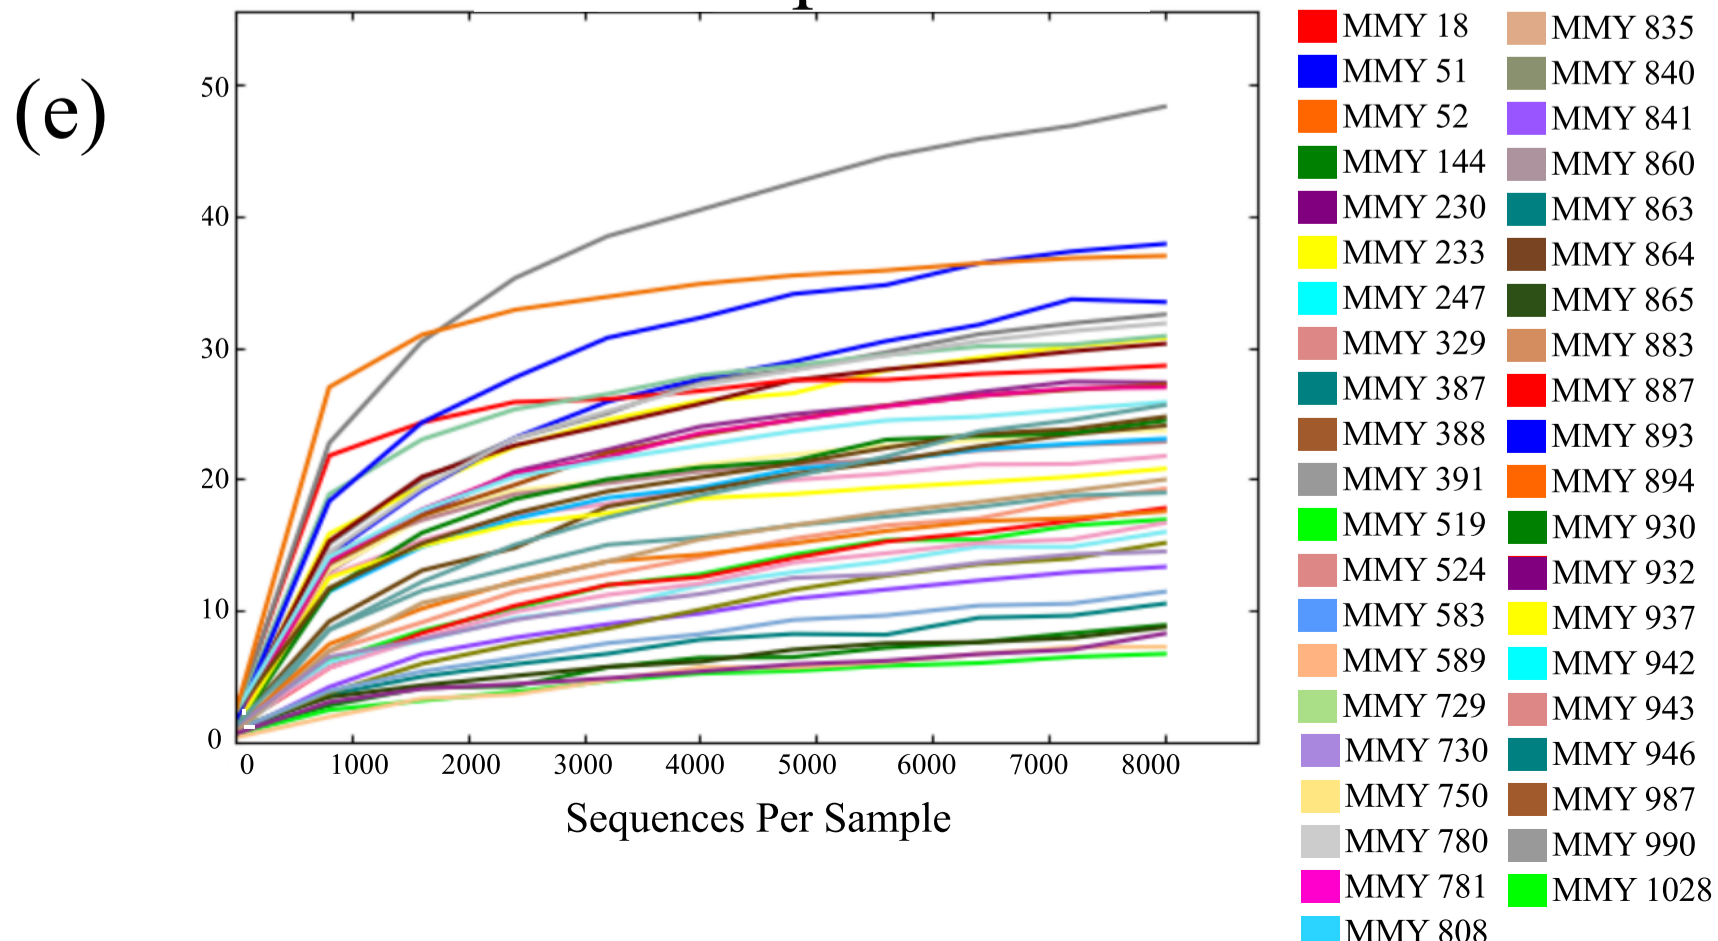

Supplement: Supplementary_Figure_2.pdf [file Supplementary_Figure_2.pdf]
