# Supplementary material for: Is there a link between aging and microbiome diversity in exceptional mammalian longevity?
Source: PeerJ journal article supplement (doi:10.7717/peerj.4174), 2018-01-08

(a)

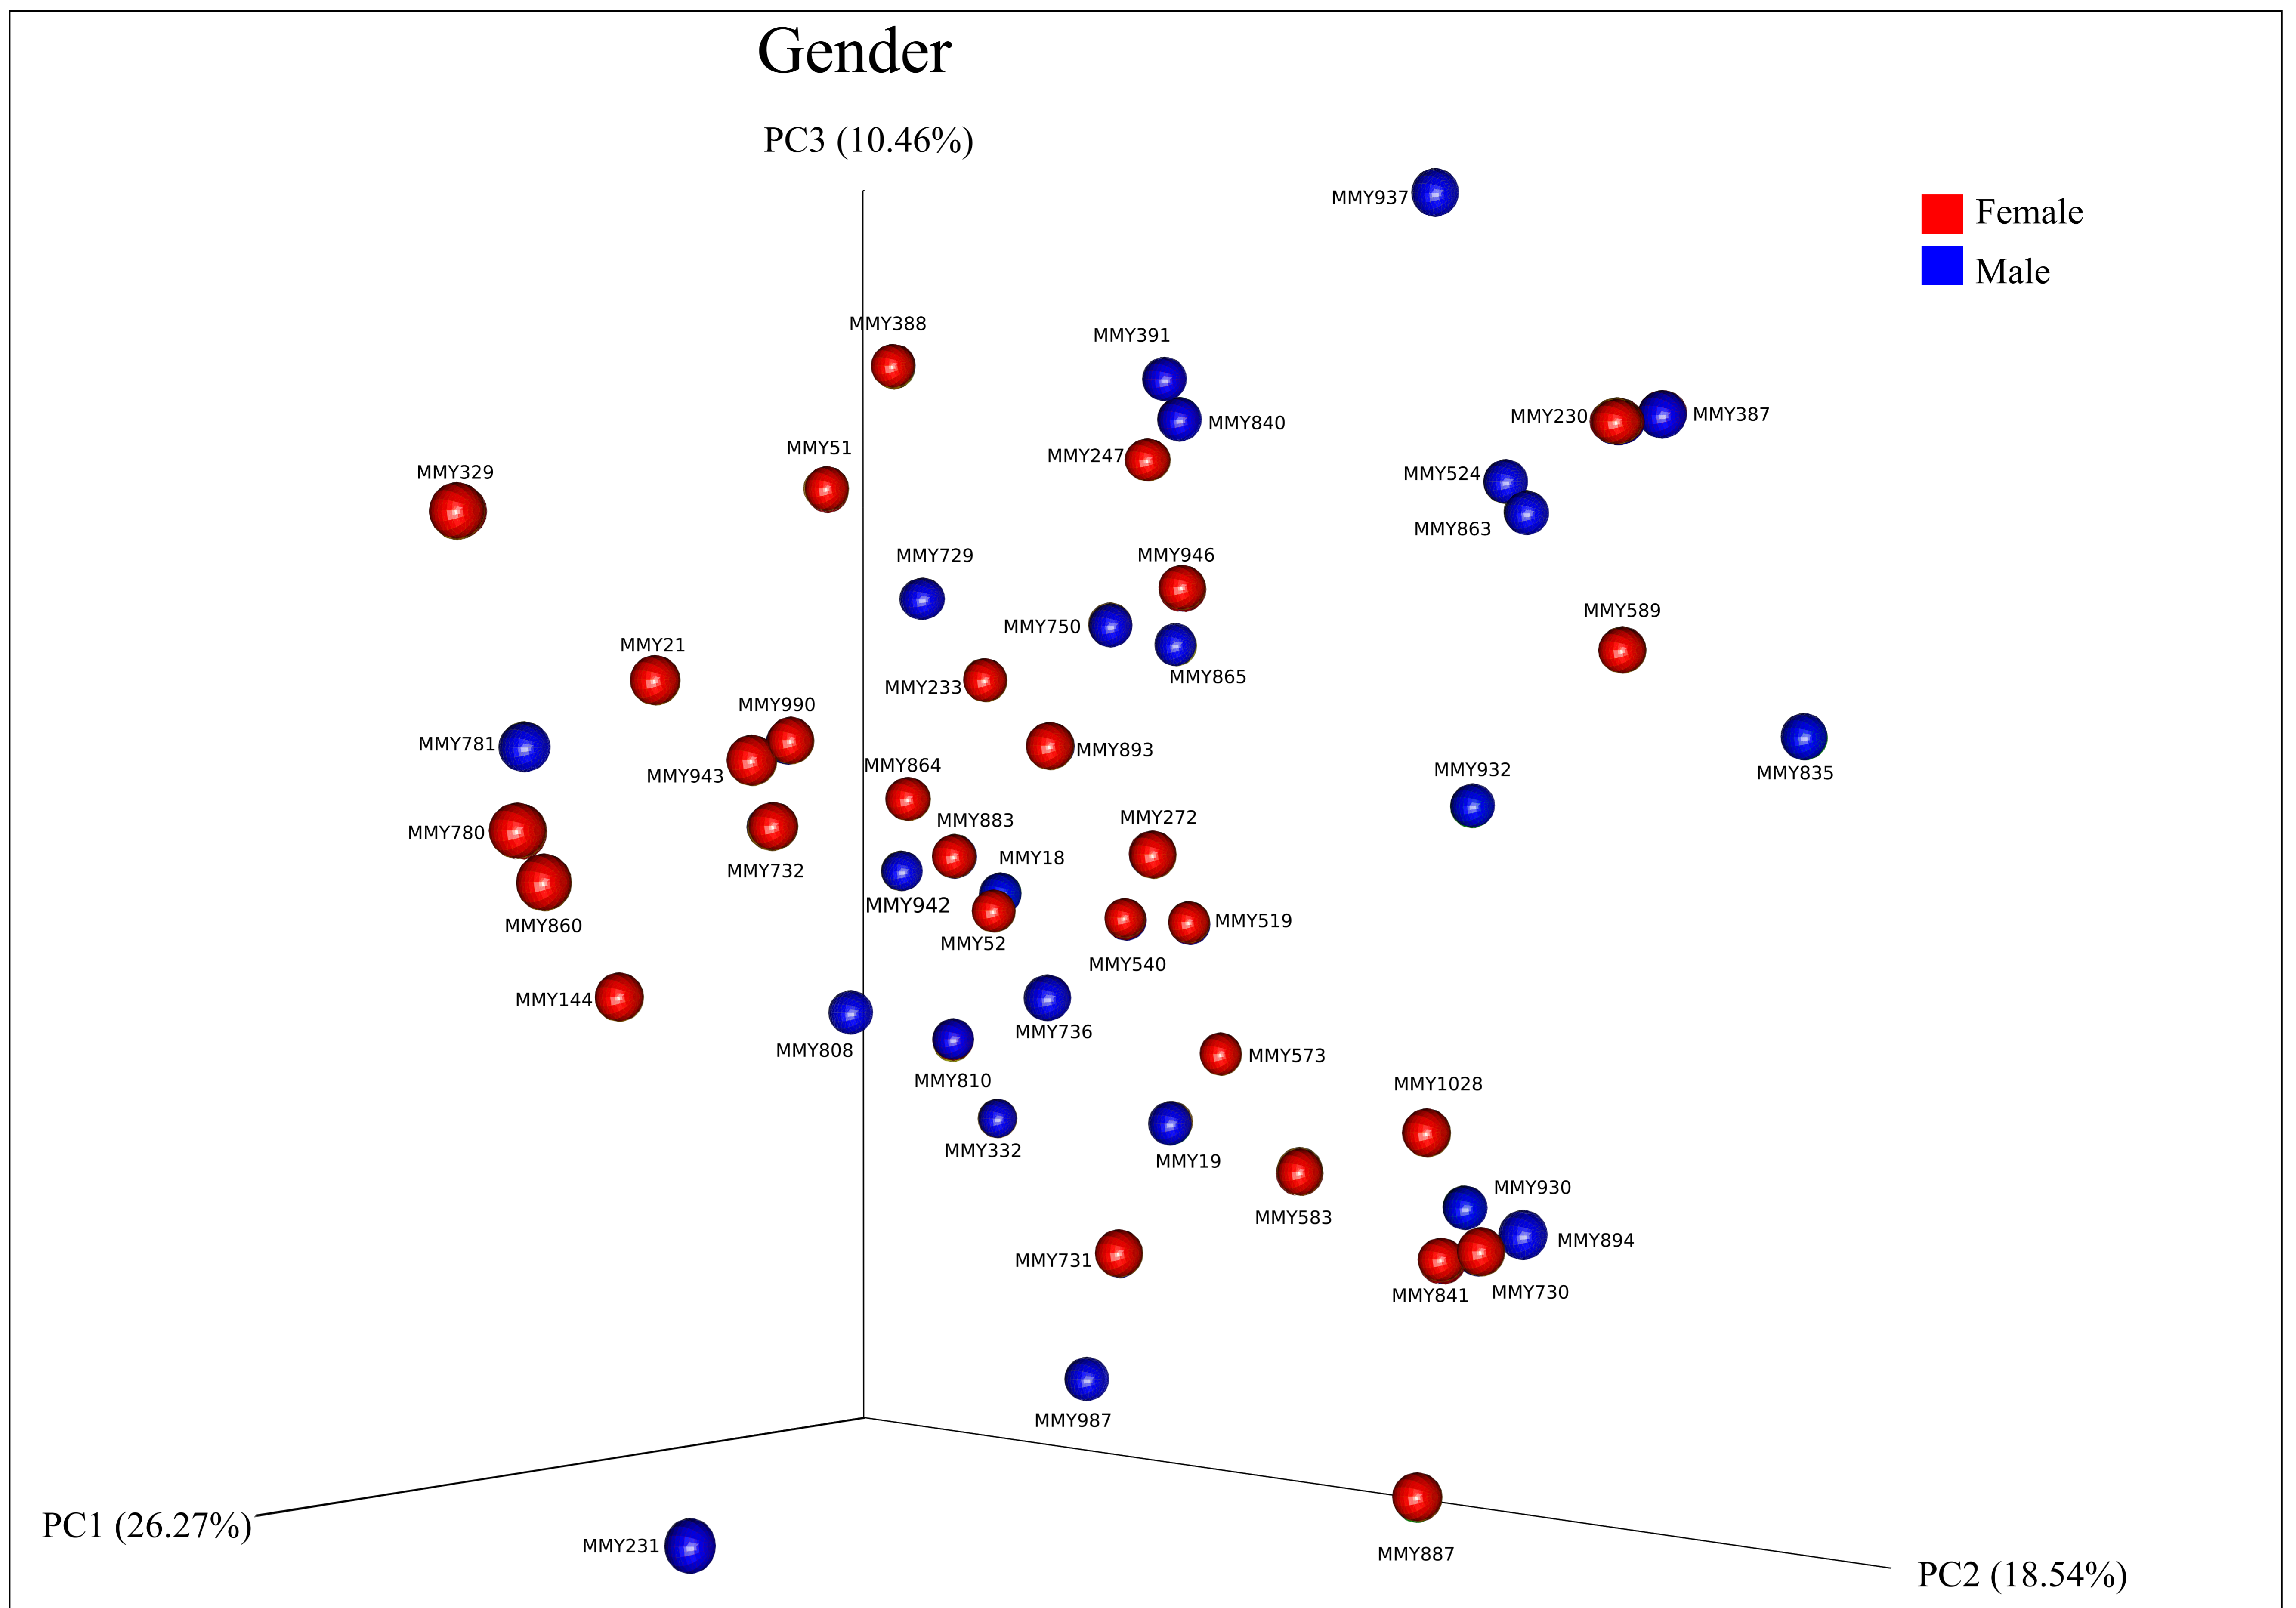

(b)

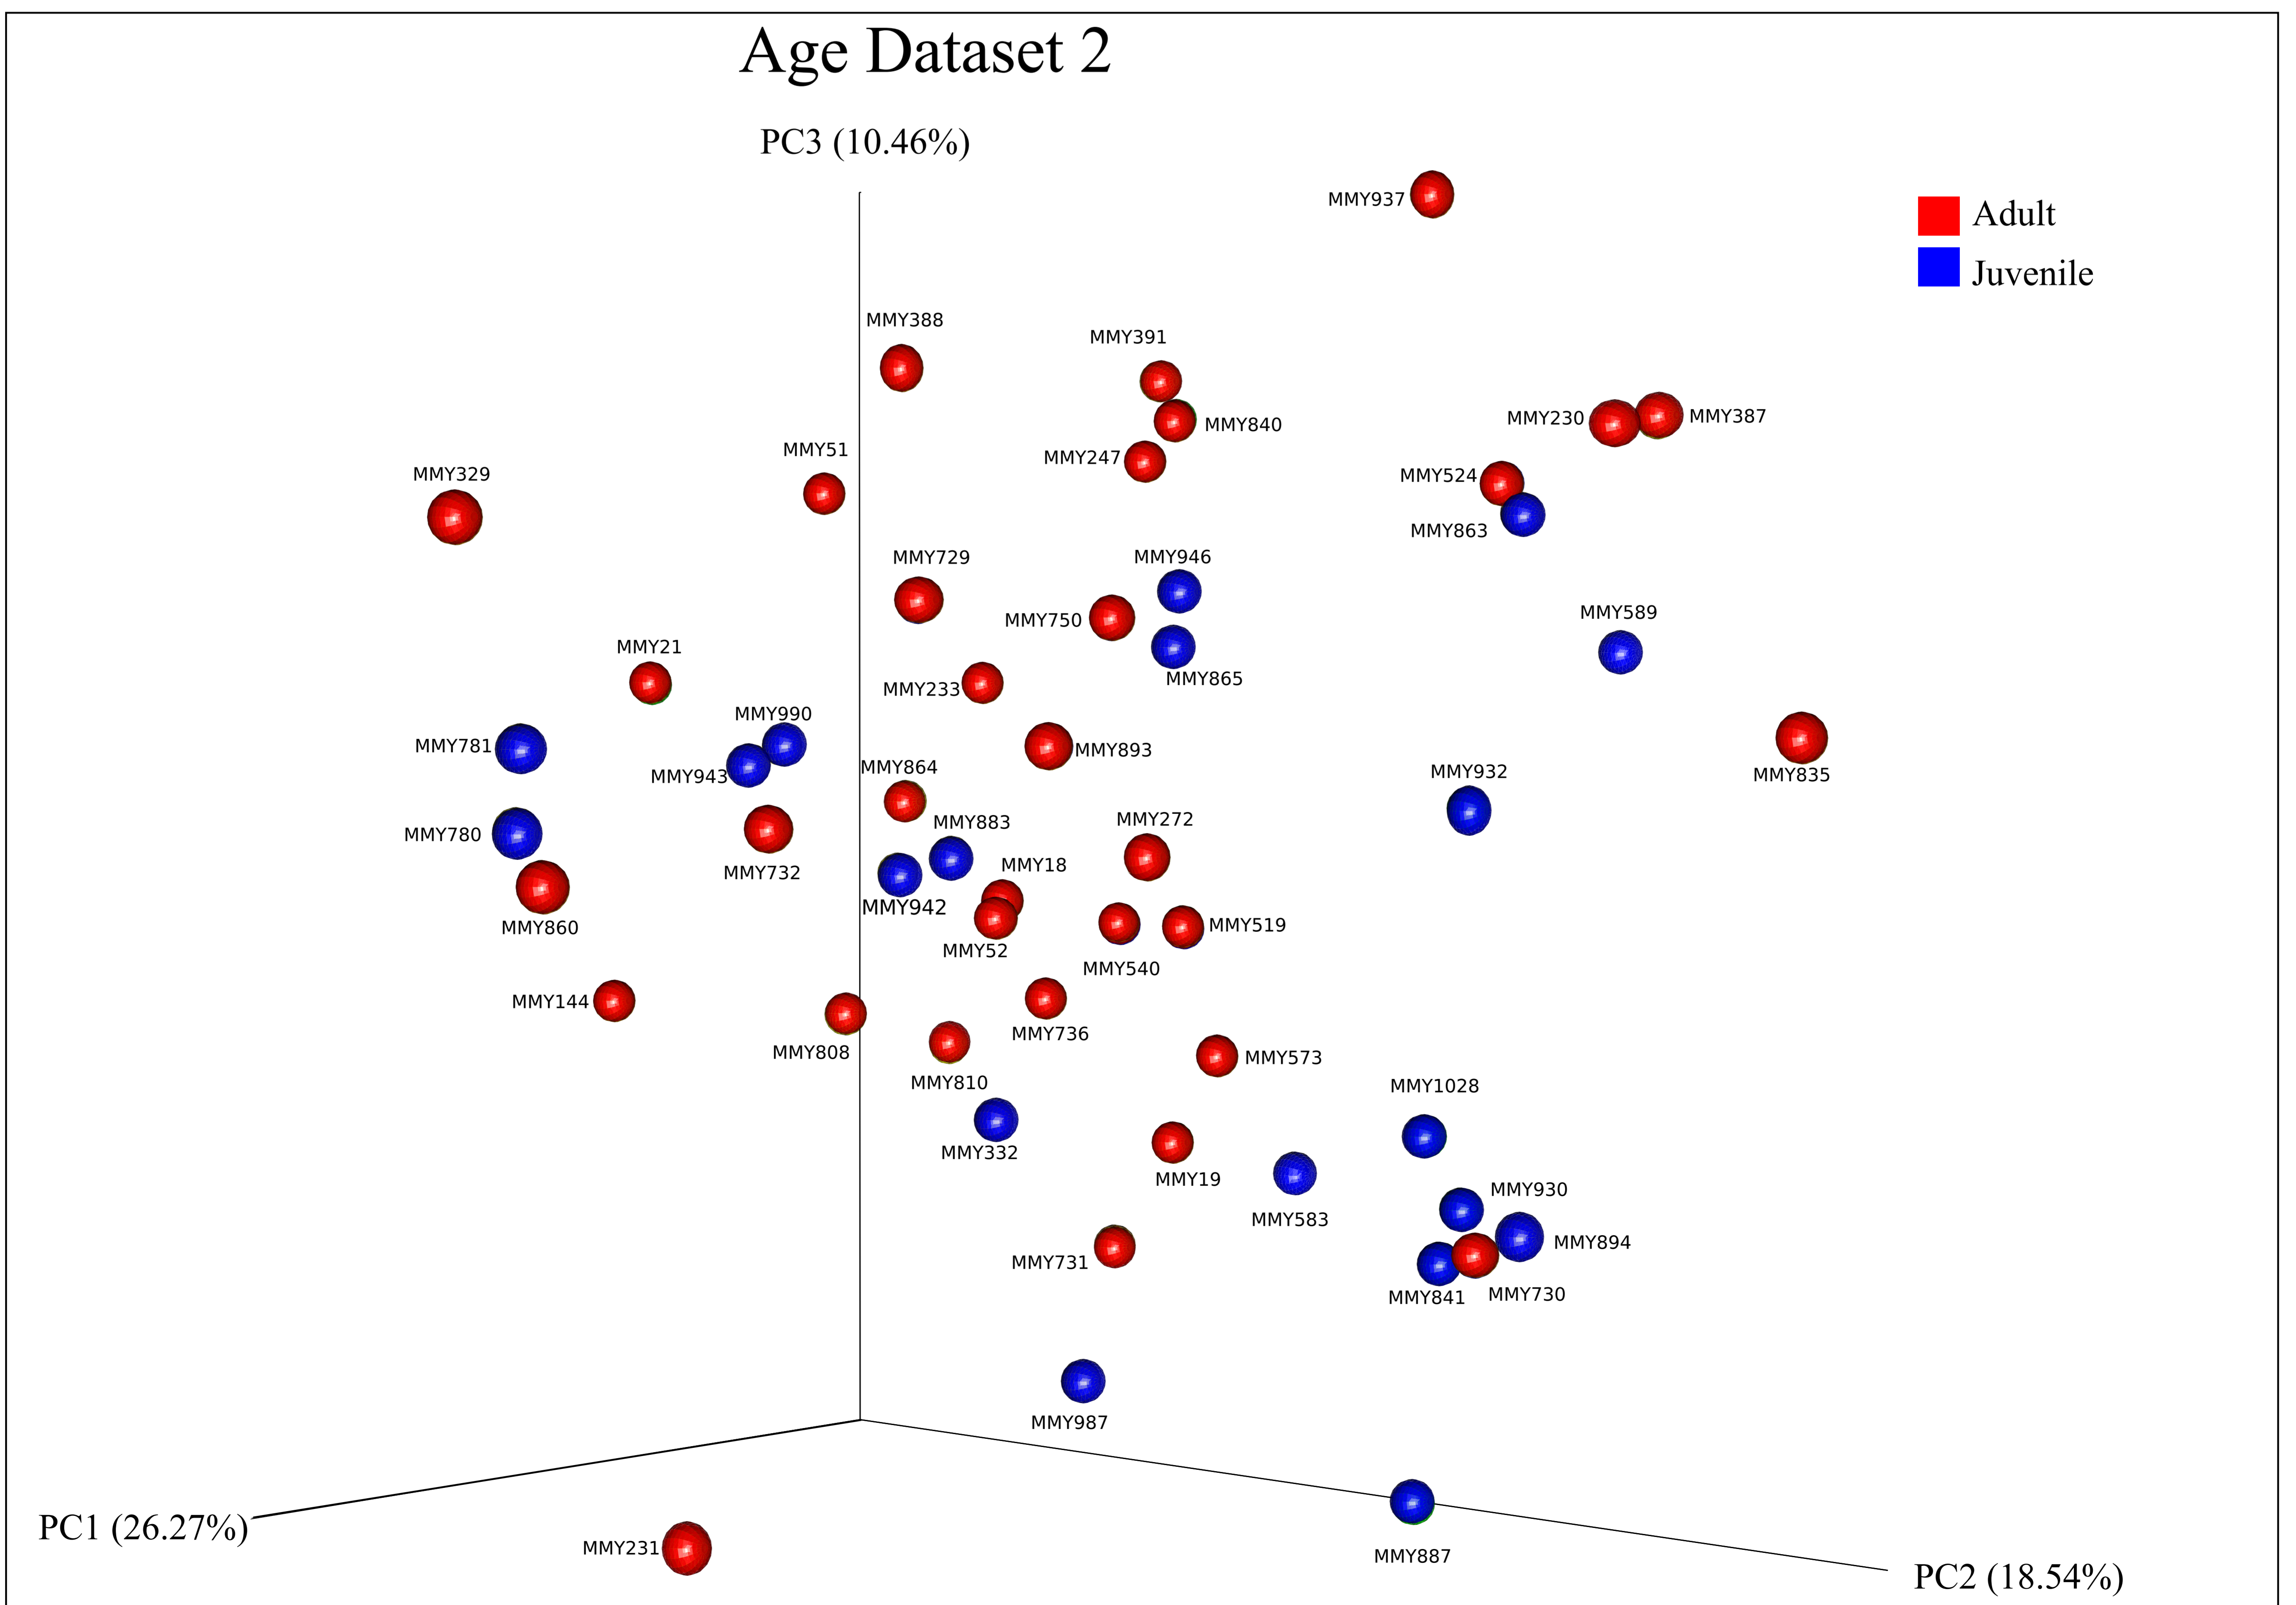

Supplement: Supplementary_Figure_5.pdf [file Supplementary_Figure_5.pdf]
