# Supplementary material for: Is there a link between aging and microbiome diversity in exceptional mammalian longevity?
Source: PeerJ. 2018 Jan 8;6:e4174. doi: 10.7717/peerj.4174 (PMC5764031; doi:10.7717/peerj.4174)
Supplement: Table S2 — The OTUs forming the core microbiomes across all bat samples are displayed. Core thresholds range from those present in 50% of samples to 90% of all individuals. [file peerj-06-4174-s010.xlsx]

## Sheet: Sheet1
# Core OTUs across 50 % of samples.
311173	['k__Bacteria', 'p__Proteobacteria', 'c__Epsilonproteobacteria', 'o__Campylobacterales', 'f__Helicobacteraceae', 'g__Flexispira', 's__']
1024520	['k__Bacteria', 'p__Proteobacteria', 'c__Betaproteobacteria', 'o__Burkholderiales', 'f__Comamonadaceae', 'g__Comamonas', 's__']
932696	['k__Bacteria', 'p__Proteobacteria', 'c__Gammaproteobacteria', 'o__Enterobacteriales', 'f__Enterobacteriaceae', 'g__Serratia', 's__marcescens']
557211	['k__Bacteria', 'p__Cyanobacteria', 'c__Synechococcophycideae', 'o__Synechococcales', 'f__Synechococcaceae', 'g__Synechococcus', 's__']
531374	['k__Bacteria', 'p__Firmicutes', 'c__Clostridia', 'o__Clostridiales', 'f__Peptostreptococcaceae']
341618	['k__Bacteria', 'p__Proteobacteria', 'c__Gammaproteobacteria', 'o__Oceanospirillales', 'f__Halomonadaceae', 'g__Candidatus Portiera', 's__']
575028	['k__Bacteria', 'p__Proteobacteria', 'c__Betaproteobacteria', 'o__Burkholderiales', 'f__Alcaligenaceae']
1111294	['k__Bacteria', 'p__Proteobacteria', 'c__Gammaproteobacteria', 'o__Enterobacteriales', 'f__Enterobacteriaceae', 'g__', 's__']
984831	['k__Bacteria', 'p__Actinobacteria', 'c__Actinobacteria', 'o__Actinomycetales', 'f__Corynebacteriaceae', 'g__Corynebacterium', 's__']
570350	['k__Bacteria', 'p__Proteobacteria', 'c__Alphaproteobacteria', 'o__Sphingomonadales', 'f__Sphingomonadaceae', 'g__Sphingobium', 's__']
988314	['k__Bacteria', 'p__Proteobacteria', 'c__Gammaproteobacteria', 'o__Pseudomonadales', 'f__Moraxellaceae', 'g__Acinetobacter', 's__']
4484466	['k__Bacteria', 'p__Proteobacteria', 'c__Gammaproteobacteria', 'o__Enterobacteriales', 'f__Enterobacteriaceae', 'g__', 's__']
667570	['k__Bacteria', 'p__Proteobacteria', 'c__Gammaproteobacteria', 'o__Enterobacteriales', 'f__Enterobacteriaceae', 'g__', 's__']
555945	['k__Bacteria', 'p__Firmicutes', 'c__Clostridia', 'o__Clostridiales', 'f__', 'g__', 's__']
1106617	['k__Bacteria', 'p__Proteobacteria', 'c__Betaproteobacteria', 'o__Burkholderiales', 'f__Comamonadaceae', 'g__Delftia', 's__']
830290	['k__Bacteria', 'p__Proteobacteria', 'c__Gammaproteobacteria', 'o__Vibrionales', 'f__Pseudoalteromonadaceae', 'g__Pseudoalteromonas', 's__']
587045	['k__Bacteria', 'p__Actinobacteria', 'c__Actinobacteria', 'o__Actinomycetales', 'f__Corynebacteriaceae', 'g__Corynebacterium', 's__']
884345	['k__Bacteria', 'p__Proteobacteria', 'c__Gammaproteobacteria', 'o__Oceanospirillales', 'f__', 'g__', 's__']
528421	['k__Bacteria', 'p__Proteobacteria', 'c__Gammaproteobacteria', 'o__Enterobacteriales', 'f__Enterobacteriaceae', 'g__Citrobacter', 's__']
1141541	['k__Bacteria', 'p__Tenericutes', 'c__Mollicutes', 'o__Mycoplasmatales', 'f__Mycoplasmataceae', 'g__Mycoplasma']
974121	['k__Bacteria', 'p__Proteobacteria', 'c__Gammaproteobacteria', 'o__Pseudomonadales', 'f__Pseudomonadaceae', 'g__Pseudomonas', 's__']
1084865	['k__Bacteria', 'p__Firmicutes', 'c__Bacilli', 'o__Bacillales', 'f__Staphylococcaceae', 'g__Staphylococcus', 's__']
829851	['k__Bacteria', 'p__Proteobacteria', 'c__Gammaproteobacteria', 'o__Pseudomonadales', 'f__Pseudomonadaceae', 'g__Pseudomonas', 's__']
1048194	['k__Bacteria', 'p__Actinobacteria', 'c__Actinobacteria', 'o__Actinomycetales', 'f__Pseudonocardiaceae', 'g__Actinomycetospora', 's__']
68458	['k__Bacteria', 'p__Proteobacteria', 'c__Alphaproteobacteria', 'o__Rhizobiales', 'f__Methylobacteriaceae', 'g__Methylobacterium', 's__']
804735	['k__Bacteria', 'p__Actinobacteria', 'c__Actinobacteria', 'o__Actinomycetales', 'f__Brevibacteriaceae', 'g__Brevibacterium', 's__']
1017364	['k__Bacteria', 'p__Firmicutes', 'c__Bacilli', 'o__Bacillales', 'f__Bacillaceae', 'g__Lentibacillus']
646549	['k__Bacteria', 'p__Proteobacteria', 'c__Gammaproteobacteria', 'o__Pseudomonadales', 'f__Pseudomonadaceae', 'g__Pseudomonas', 's__']
889025	['k__Bacteria', 'p__Proteobacteria', 'c__Gammaproteobacteria', 'o__Pseudomonadales', 'f__Moraxellaceae', 'g__Acinetobacter', 's__rhizosphaerae']
823476	['k__Bacteria', 'p__Proteobacteria', 'c__Gammaproteobacteria', 'o__Alteromonadales', 'f__Alteromonadaceae', 'g__Alteromonas', 's__']
349901	['k__Bacteria', 'p__Proteobacteria', 'c__Gammaproteobacteria', 'o__Legionellales', 'f__Coxiellaceae', 'g__Rickettsiella', 's__']
837283	['k__Bacteria', 'p__Proteobacteria', 'c__Gammaproteobacteria', 'o__Enterobacteriales', 'f__Enterobacteriaceae', 'g__Serratia', 's__']
160015	['k__Bacteria', 'p__Proteobacteria', 'c__Gammaproteobacteria', 'o__Pasteurellales', 'f__Pasteurellaceae', 'g__Actinobacillus']
583448	['k__Bacteria', 'p__Actinobacteria', 'c__Actinobacteria', 'o__Actinomycetales', 'f__Corynebacteriaceae', 'g__Corynebacterium', 's__']
1111582	['k__Bacteria', 'p__Firmicutes', 'c__Bacilli', 'o__Lactobacillales', 'f__Enterococcaceae', 'g__Enterococcus', 's__']
639502	['k__Bacteria', 'p__Actinobacteria', 'c__Acidimicrobiia', 'o__Acidimicrobiales', 'f__OCS155', 'g__', 's__']
1047041	['k__Bacteria', 'p__Actinobacteria', 'c__Actinobacteria', 'o__Actinomycetales', 'f__Corynebacteriaceae', 'g__Corynebacterium', 's__']
344394	['k__Bacteria', 'p__Firmicutes', 'c__Clostridia', 'o__Clostridiales', 'f__Peptostreptococcaceae']
355538	['k__Bacteria', 'p__Cyanobacteria', 'c__Synechococcophycideae', 'o__Synechococcales', 'f__Synechococcaceae', 'g__Prochlorococcus', 's__']
329506	['k__Bacteria', 'p__Proteobacteria', 'c__Gammaproteobacteria', 'o__Oceanospirillales', 'f__Alcanivoracaceae', 'g__Alcanivorax', 's__dieselolei']
922761	['k__Bacteria', 'p__Proteobacteria', 'c__Gammaproteobacteria', 'o__Enterobacteriales', 'f__Enterobacteriaceae']
929230	['k__Bacteria', 'p__Actinobacteria', 'c__Actinobacteria', 'o__Actinomycetales', 'f__Corynebacteriaceae', 'g__Corynebacterium', 's__']
566578	['k__Bacteria', 'p__Proteobacteria', 'c__Betaproteobacteria', 'o__Burkholderiales', 'f__Oxalobacteraceae']
New.ReferenceOTU78	['k__Bacteria', 'p__Firmicutes', 'c__Bacilli', 'o__Bacillales', 'f__Planococcaceae', 'g__Ureibacillus', 's__']
New.ReferenceOTU5	['k__Bacteria', 'p__Firmicutes', 'c__Bacilli', 'o__Bacillales', 'f__Bacillaceae', 'g__Natronobacillus', 's__']
New.ReferenceOTU19	['k__Bacteria', 'p__Chlamydiae', 'c__Chlamydiia', 'o__Chlamydiales', 'f__Chlamydiaceae', 'g__Chlamydia']
New.ReferenceOTU105	['k__Bacteria', 'p__Proteobacteria', 'c__Epsilonproteobacteria', 'o__Campylobacterales', 'f__Helicobacteraceae', 'g__Helicobacter']
# Core OTUs across 60 % of samples.
311173	['k__Bacteria', 'p__Proteobacteria', 'c__Epsilonproteobacteria', 'o__Campylobacterales', 'f__Helicobacteraceae', 'g__Flexispira', 's__']
932696	['k__Bacteria', 'p__Proteobacteria', 'c__Gammaproteobacteria', 'o__Enterobacteriales', 'f__Enterobacteriaceae', 'g__Serratia', 's__marcescens']
557211	['k__Bacteria', 'p__Cyanobacteria', 'c__Synechococcophycideae', 'o__Synechococcales', 'f__Synechococcaceae', 'g__Synechococcus', 's__']
1111294	['k__Bacteria', 'p__Proteobacteria', 'c__Gammaproteobacteria', 'o__Enterobacteriales', 'f__Enterobacteriaceae', 'g__', 's__']
984831	['k__Bacteria', 'p__Actinobacteria', 'c__Actinobacteria', 'o__Actinomycetales', 'f__Corynebacteriaceae', 'g__Corynebacterium', 's__']
570350	['k__Bacteria', 'p__Proteobacteria', 'c__Alphaproteobacteria', 'o__Sphingomonadales', 'f__Sphingomonadaceae', 'g__Sphingobium', 's__']
988314	['k__Bacteria', 'p__Proteobacteria', 'c__Gammaproteobacteria', 'o__Pseudomonadales', 'f__Moraxellaceae', 'g__Acinetobacter', 's__']
667570	['k__Bacteria', 'p__Proteobacteria', 'c__Gammaproteobacteria', 'o__Enterobacteriales', 'f__Enterobacteriaceae', 'g__', 's__']
587045	['k__Bacteria', 'p__Actinobacteria', 'c__Actinobacteria', 'o__Actinomycetales', 'f__Corynebacteriaceae', 'g__Corynebacterium', 's__']
528421	['k__Bacteria', 'p__Proteobacteria', 'c__Gammaproteobacteria', 'o__Enterobacteriales', 'f__Enterobacteriaceae', 'g__Citrobacter', 's__']
1141541	['k__Bacteria', 'p__Tenericutes', 'c__Mollicutes', 'o__Mycoplasmatales', 'f__Mycoplasmataceae', 'g__Mycoplasma']
974121	['k__Bacteria', 'p__Proteobacteria', 'c__Gammaproteobacteria', 'o__Pseudomonadales', 'f__Pseudomonadaceae', 'g__Pseudomonas', 's__']
1084865	['k__Bacteria', 'p__Firmicutes', 'c__Bacilli', 'o__Bacillales', 'f__Staphylococcaceae', 'g__Staphylococcus', 's__']
1048194	['k__Bacteria', 'p__Actinobacteria', 'c__Actinobacteria', 'o__Actinomycetales', 'f__Pseudonocardiaceae', 'g__Actinomycetospora', 's__']
68458	['k__Bacteria', 'p__Proteobacteria', 'c__Alphaproteobacteria', 'o__Rhizobiales', 'f__Methylobacteriaceae', 'g__Methylobacterium', 's__']
1017364	['k__Bacteria', 'p__Firmicutes', 'c__Bacilli', 'o__Bacillales', 'f__Bacillaceae', 'g__Lentibacillus']
646549	['k__Bacteria', 'p__Proteobacteria', 'c__Gammaproteobacteria', 'o__Pseudomonadales', 'f__Pseudomonadaceae', 'g__Pseudomonas', 's__']
349901	['k__Bacteria', 'p__Proteobacteria', 'c__Gammaproteobacteria', 'o__Legionellales', 'f__Coxiellaceae', 'g__Rickettsiella', 's__']
837283	['k__Bacteria', 'p__Proteobacteria', 'c__Gammaproteobacteria', 'o__Enterobacteriales', 'f__Enterobacteriaceae', 'g__Serratia', 's__']
160015	['k__Bacteria', 'p__Proteobacteria', 'c__Gammaproteobacteria', 'o__Pasteurellales', 'f__Pasteurellaceae', 'g__Actinobacillus']
583448	['k__Bacteria', 'p__Actinobacteria', 'c__Actinobacteria', 'o__Actinomycetales', 'f__Corynebacteriaceae', 'g__Corynebacterium', 's__']
1111582	['k__Bacteria', 'p__Firmicutes', 'c__Bacilli', 'o__Lactobacillales', 'f__Enterococcaceae', 'g__Enterococcus', 's__']
344394	['k__Bacteria', 'p__Firmicutes', 'c__Clostridia', 'o__Clostridiales', 'f__Peptostreptococcaceae']
922761	['k__Bacteria', 'p__Proteobacteria', 'c__Gammaproteobacteria', 'o__Enterobacteriales', 'f__Enterobacteriaceae']
929230	['k__Bacteria', 'p__Actinobacteria', 'c__Actinobacteria', 'o__Actinomycetales', 'f__Corynebacteriaceae', 'g__Corynebacterium', 's__']
566578	['k__Bacteria', 'p__Proteobacteria', 'c__Betaproteobacteria', 'o__Burkholderiales', 'f__Oxalobacteraceae']
New.ReferenceOTU78	['k__Bacteria', 'p__Firmicutes', 'c__Bacilli', 'o__Bacillales', 'f__Planococcaceae', 'g__Ureibacillus', 's__']
New.ReferenceOTU5	['k__Bacteria', 'p__Firmicutes', 'c__Bacilli', 'o__Bacillales', 'f__Bacillaceae', 'g__Natronobacillus', 's__']
New.ReferenceOTU105	['k__Bacteria', 'p__Proteobacteria', 'c__Epsilonproteobacteria', 'o__Campylobacterales', 'f__Helicobacteraceae', 'g__Helicobacter']
# Core OTUs across 70 % of samples.
311173	['k__Bacteria', 'p__Proteobacteria', 'c__Epsilonproteobacteria', 'o__Campylobacterales', 'f__Helicobacteraceae', 'g__Flexispira', 's__']
1111294	['k__Bacteria', 'p__Proteobacteria', 'c__Gammaproteobacteria', 'o__Enterobacteriales', 'f__Enterobacteriaceae', 'g__', 's__']
984831	['k__Bacteria', 'p__Actinobacteria', 'c__Actinobacteria', 'o__Actinomycetales', 'f__Corynebacteriaceae', 'g__Corynebacterium', 's__']
988314	['k__Bacteria', 'p__Proteobacteria', 'c__Gammaproteobacteria', 'o__Pseudomonadales', 'f__Moraxellaceae', 'g__Acinetobacter', 's__']
667570	['k__Bacteria', 'p__Proteobacteria', 'c__Gammaproteobacteria', 'o__Enterobacteriales', 'f__Enterobacteriaceae', 'g__', 's__']
587045	['k__Bacteria', 'p__Actinobacteria', 'c__Actinobacteria', 'o__Actinomycetales', 'f__Corynebacteriaceae', 'g__Corynebacterium', 's__']
1084865	['k__Bacteria', 'p__Firmicutes', 'c__Bacilli', 'o__Bacillales', 'f__Staphylococcaceae', 'g__Staphylococcus', 's__']
1017364	['k__Bacteria', 'p__Firmicutes', 'c__Bacilli', 'o__Bacillales', 'f__Bacillaceae', 'g__Lentibacillus']
646549	['k__Bacteria', 'p__Proteobacteria', 'c__Gammaproteobacteria', 'o__Pseudomonadales', 'f__Pseudomonadaceae', 'g__Pseudomonas', 's__']
349901	['k__Bacteria', 'p__Proteobacteria', 'c__Gammaproteobacteria', 'o__Legionellales', 'f__Coxiellaceae', 'g__Rickettsiella', 's__']
160015	['k__Bacteria', 'p__Proteobacteria', 'c__Gammaproteobacteria', 'o__Pasteurellales', 'f__Pasteurellaceae', 'g__Actinobacillus']
583448	['k__Bacteria', 'p__Actinobacteria', 'c__Actinobacteria', 'o__Actinomycetales', 'f__Corynebacteriaceae', 'g__Corynebacterium', 's__']
1111582	['k__Bacteria', 'p__Firmicutes', 'c__Bacilli', 'o__Lactobacillales', 'f__Enterococcaceae', 'g__Enterococcus', 's__']
344394	['k__Bacteria', 'p__Firmicutes', 'c__Clostridia', 'o__Clostridiales', 'f__Peptostreptococcaceae']
922761	['k__Bacteria', 'p__Proteobacteria', 'c__Gammaproteobacteria', 'o__Enterobacteriales', 'f__Enterobacteriaceae']
929230	['k__Bacteria', 'p__Actinobacteria', 'c__Actinobacteria', 'o__Actinomycetales', 'f__Corynebacteriaceae', 'g__Corynebacterium', 's__']
566578	['k__Bacteria', 'p__Proteobacteria', 'c__Betaproteobacteria', 'o__Burkholderiales', 'f__Oxalobacteraceae']
New.ReferenceOTU78	['k__Bacteria', 'p__Firmicutes', 'c__Bacilli', 'o__Bacillales', 'f__Planococcaceae', 'g__Ureibacillus', 's__']
New.ReferenceOTU5	['k__Bacteria', 'p__Firmicutes', 'c__Bacilli', 'o__Bacillales', 'f__Bacillaceae', 'g__Natronobacillus', 's__']
New.ReferenceOTU105	['k__Bacteria', 'p__Proteobacteria', 'c__Epsilonproteobacteria', 'o__Campylobacterales', 'f__Helicobacteraceae', 'g__Helicobacter']
# Core OTUs across 80 % of samples.
1111294	['k__Bacteria', 'p__Proteobacteria', 'c__Gammaproteobacteria', 'o__Enterobacteriales', 'f__Enterobacteriaceae', 'g__', 's__']
984831	['k__Bacteria', 'p__Actinobacteria', 'c__Actinobacteria', 'o__Actinomycetales', 'f__Corynebacteriaceae', 'g__Corynebacterium', 's__']
1084865	['k__Bacteria', 'p__Firmicutes', 'c__Bacilli', 'o__Bacillales', 'f__Staphylococcaceae', 'g__Staphylococcus', 's__']
1017364	['k__Bacteria', 'p__Firmicutes', 'c__Bacilli', 'o__Bacillales', 'f__Bacillaceae', 'g__Lentibacillus']
646549	['k__Bacteria', 'p__Proteobacteria', 'c__Gammaproteobacteria', 'o__Pseudomonadales', 'f__Pseudomonadaceae', 'g__Pseudomonas', 's__']
349901	['k__Bacteria', 'p__Proteobacteria', 'c__Gammaproteobacteria', 'o__Legionellales', 'f__Coxiellaceae', 'g__Rickettsiella', 's__']
160015	['k__Bacteria', 'p__Proteobacteria', 'c__Gammaproteobacteria', 'o__Pasteurellales', 'f__Pasteurellaceae', 'g__Actinobacillus']
583448	['k__Bacteria', 'p__Actinobacteria', 'c__Actinobacteria', 'o__Actinomycetales', 'f__Corynebacteriaceae', 'g__Corynebacterium', 's__']
1111582	['k__Bacteria', 'p__Firmicutes', 'c__Bacilli', 'o__Lactobacillales', 'f__Enterococcaceae', 'g__Enterococcus', 's__']
344394	['k__Bacteria', 'p__Firmicutes', 'c__Clostridia', 'o__Clostridiales', 'f__Peptostreptococcaceae']
922761	['k__Bacteria', 'p__Proteobacteria', 'c__Gammaproteobacteria', 'o__Enterobacteriales', 'f__Enterobacteriaceae']
New.ReferenceOTU78	['k__Bacteria', 'p__Firmicutes', 'c__Bacilli', 'o__Bacillales', 'f__Planococcaceae', 'g__Ureibacillus', 's__']
New.ReferenceOTU5	['k__Bacteria', 'p__Firmicutes', 'c__Bacilli', 'o__Bacillales', 'f__Bacillaceae', 'g__Natronobacillus', 's__']
# Core OTUs across 90 % of samples.
1111294	['k__Bacteria', 'p__Proteobacteria', 'c__Gammaproteobacteria', 'o__Enterobacteriales', 'f__Enterobacteriaceae', 'g__', 's__']
646549	['k__Bacteria', 'p__Proteobacteria', 'c__Gammaproteobacteria', 'o__Pseudomonadales', 'f__Pseudomonadaceae', 'g__Pseudomonas', 's__']
583448	['k__Bacteria', 'p__Actinobacteria', 'c__Actinobacteria', 'o__Actinomycetales', 'f__Corynebacteriaceae', 'g__Corynebacterium', 's__']
1111582	['k__Bacteria', 'p__Firmicutes', 'c__Bacilli', 'o__Lactobacillales', 'f__Enterococcaceae', 'g__Enterococcus', 's__']
344394	['k__Bacteria', 'p__Firmicutes', 'c__Clostridia', 'o__Clostridiales', 'f__Peptostreptococcaceae']
922761	['k__Bacteria', 'p__Proteobacteria', 'c__Gammaproteobacteria', 'o__Enterobacteriales', 'f__Enterobacteriaceae']
New.ReferenceOTU78	['k__Bacteria', 'p__Firmicutes', 'c__Bacilli', 'o__Bacillales', 'f__Planococcaceae', 'g__Ureibacillus', 's__']
