# Supplementary material for: Is there a link between aging and microbiome diversity in exceptional mammalian longevity?
Source: PeerJ. 2018 Jan 8;6:e4174. doi: 10.7717/peerj.4174 (PMC5764031; doi:10.7717/peerj.4174)
Supplement: Table S4 — The functional gene pathways in the anal microbiome of Myotis myotis were predicted across all samples. Functional pathways are ranked from most to least. [file peerj-06-4174-s012.xlsx]

## Sheet: Sheet1
#OTU ID	MMY990	MMY52	MMY388	MMY894	MMY540	MMY144	MMY231	MMY233	MMY524	MMY893	MMY18	MMY865	MMY883	MMY943	MMY230	MMY729	MMY860	MMY841	MMY387	MMY946	MMY589	MMY750	MMY730	MMY51	MMY937	MMY391	MMY835	MMY247	MMY930	MMY780	MMY932	MMY519	MMY987	MMY583	MMY942	MMY1028	MMY863	MMY887	MMY864	MMY781	MMY732	MMY329	MMY808	MMY573	MMY731	MMY272	MMY21	MMY840	MMY810
Environmental Information Processing;Membrane Transport;Transporters	2539771	492485	3145270	1918772	16900	1125123	62034	1570356	3741719	2408632	6202759	1505513	1346712	566768	3503052	3164486	1521574	4993232	9387153	3162305	4935820	1753905	11362277	1449277	340433	2495937	582381	1105552	8310757	1166361	13609304	1251997	823288	8221992	1578721	7932173	3547155	4934953	375549	1658402	29000	5263409	2667238	2098	13229	9012	17485	816707	11935
Environmental Information Processing;Membrane Transport;ABC transporters	1486971	308062	1349248	1294448	10534	699785	35415	962344	2079988	1314887	3693091	754441	757145	310138	2232824	1743837	956733	2189105	5954087	1735832	2680555	978990	4881271	793287	215415	1569162	305638	662005	3660927	722534	6462388	508314	447011	3605514	982986	3509173	2054779	2102312	237240	947134	15797	2842087	1659887	1250	6316	5306	10209	476155	7153
Unclassified;Poorly Characterized;General function prediction only	1657641	349909	1372831	1662940	11315	655883	37085	1007383	1476836	1469447	3923812	754812	854373	290674	1237122	1870438	875164	2072451	3151987	1703074	2784091	1032283	4821901	779424	189895	934958	304099	389422	3399795	668195	6313526	674295	633361	3389127	1090657	3321011	2165422	2439998	198351	903849	15456	2651675	2259766	1572	6490	5617	11646	470082	9526
Genetic Information Processing;Replication and Repair;DNA repair and recombination proteins	1261017	226501	993423	1309423	7787	619121	35038	782417	938398	1070256	2690219	561469	631217	220323	721740	1274775	748786	1339758	1813316	1284867	1900172	804637	3488550	600412	126565	591674	208490	261568	2207638	606628	4273391	732924	497458	2208269	799884	2130213	1561183	2248878	142514	785238	12615	2401808	1617599	1122	4656	3680	9230	321077	6301
Metabolism;Nucleotide Metabolism;Purine metabolism	1046613	185152	911813	1211595	6453	607515	33068	676027	795622	846834	2255751	484766	536642	192836	589841	1083186	718633	1185320	1489754	1048612	1610550	699693	3065307	518288	114729	496512	180279	222289	1916191	586451	3600819	624889	413008	1963215	703436	1873319	1276611	1959719	125745	752982	11622	2338259	1336519	956	4048	2908	7963	274846	5145
Genetic Information Processing;Translation;Ribosome	1100027	165946	783354	1445650	6005	511728	33669	543501	636754	841057	2133636	489678	580831	174227	428031	963429	604063	1115782	1035723	1064698	1279156	655277	3309753	477371	123031	391826	156176	176513	1813075	500479	3212924	936800	485065	1813683	694870	1711270	1052524	2656268	112461	643528	10106	2042435	1189788	908	3958	2629	7710	198922	4609
Genetic Information Processing;Transcription;Transcription factors	613900	130152	707468	417325	4355	223021	11261	467897	1035117	727858	1568404	413262	355971	142060	866246	812384	325479	1417201	2322437	905147	1582334	452476	2889688	362325	82240	608023	160772	259863	2333707	235403	4100887	123202	196303	2321324	406111	2287353	1235049	848239	91753	349057	7357	1119329	854663	586	3631	2458	4478	258454	3663
Metabolism;Enzyme Families;Peptidases	747248	145032	544682	828591	5056	337879	19577	470862	790913	752818	1709576	412637	425405	145567	547631	755325	420406	1400369	1404768	866583	1261251	456939	3110282	385086	84209	425266	154661	179698	2252315	335406	3761986	351984	278126	2281528	490248	2197085	1031816	1360341	90672	429829	8342	1269323	972155	744	3973	2478	5564	196063	4102
Environmental Information Processing;Signal Transduction;Two-component system	891950	216153	573899	1110837	7108	268833	15101	589641	871085	712315	2279274	399345	467223	146702	896555	1078482	423917	840538	2330197	971144	1932544	609006	1773776	385949	90763	628064	164649	235614	1404532	282357	3078397	174549	321378	1342307	646252	1415932	1386041	873098	119745	394710	7115	1097564	1298469	878	2828	3456	5951	336503	5754
Environmental Information Processing;Membrane Transport;Secretion system	806716	190839	422461	1123338	6032	258968	14747	569978	843791	650170	1997487	422261	443581	134687	756371	887855	368102	913767	1959393	978550	2153748	628608	1882699	358879	91212	533303	160875	201624	1464985	250511	3311397	199904	313676	1454577	618906	1548483	1314189	868869	108607	339315	7060	927665	1255812	794	2890	2863	5494	359065	4869
Metabolism;Nucleotide Metabolism;Pyrimidine metabolism	766889	125677	628680	858996	4467	393804	23891	466476	588181	659140	1613517	377218	404732	137794	405922	739257	465031	934863	1023124	788080	1135042	505018	2560768	362943	80610	347827	128040	155758	1534930	384483	2792508	592193	326107	1537642	488408	1466617	949158	1773589	85697	495781	8091	1582460	894699	689	3113	2102	5726	181627	3595
Unclassified;Poorly Characterized;Function unknown	781707	162929	522237	994251	5140	283275	16490	554917	761006	605619	1815566	370134	405850	126999	767086	885561	398675	666497	2002836	841180	1673359	557551	1596704	331803	96444	556679	136427	216366	1081995	288679	2533600	288813	317651	1073198	587723	1125312	1222966	1027012	107541	392143	6802	1001894	1135843	717	2444	2591	5258	289616	4427
Cellular Processes;Cell Motility;Bacterial motility proteins	691661	184158	194819	1373679	5910	90433	8487	382817	739353	539296	1787186	383999	463367	113564	559861	728478	194514	1221781	1395517	995404	1397820	367921	2259423	262974	50254	365057	139819	127525	2002166	102803	3101510	66704	252096	1904131	543083	1932060	1033356	779269	85139	151421	4807	132961	1033214	761	3237	2839	3799	213738	4639
Unclassified;Cellular Processes and Signaling;Other ion-coupled transporters	561835	101786	388972	733117	3302	333094	15507	457552	639517	507939	1214428	301967	335276	117203	528992	632466	413942	810001	1402156	679896	1248946	410479	1654720	298265	70344	397106	116587	160712	1298923	325091	2489077	116377	212997	1329162	453601	1311639	979280	621300	85009	406004	6703	1246108	931346	473	2351	1728	3868	216603	2853
Metabolism;Amino Acid Metabolism;Amino acid related enzymes	662264	122112	454588	827497	4267	324953	18884	378008	502387	529909	1425646	294971	353672	116096	394833	641016	393298	784399	992790	654152	898790	397388	1968076	312104	68549	321725	109305	136763	1272340	316983	2213482	385485	264976	1279257	442907	1222548	709018	1225324	77584	401550	6606	1220854	833874	614	2615	1883	4930	148241	3353
Genetic Information Processing;Replication and Repair;Chromosome	633585	117858	497985	771108	4059	250670	14769	405053	552138	596783	1413016	298573	346600	110444	463819	666559	325054	704201	1182081	706445	1059520	390291	1645713	280611	80359	351785	107424	149127	1171946	251488	2327904	271762	250934	1143331	437874	1129623	881583	927198	77032	342712	5877	993459	901249	567	2379	2025	4476	179529	3421
Metabolism;Carbohydrate Metabolism;Amino sugar and nucleotide sugar metabolism	508270	94734	721775	543948	3362	215851	13527	286458	518594	487985	1132553	294380	274517	101288	308375	633915	271918	958995	791974	626730	914228	337460	2232158	272040	61245	251527	110511	122620	1573637	217728	2611546	306293	182351	1572125	316420	1508344	694743	1098976	55889	331047	5869	1054342	516583	491	2719	1647	3929	142622	2778
Genetic Information Processing;Translation;Ribosome Biogenesis	631105	108690	453732	642994	3826	280410	16477	400074	510116	533190	1332727	294262	313924	106294	408752	630500	346255	658129	1037060	682932	1048671	411476	1743465	277630	83111	323272	102601	135580	1076669	273830	2152217	383552	266163	1079733	401978	1059345	818456	1163471	72380	362608	6065	1106213	875176	575	2282	1798	4531	173149	2988
Environmental Information Processing;Membrane Transport;Phosphotransferase system (PTS)	187389	11652	781122	31305	606	58866	5753	99418	604275	279107	349678	310210	145316	64513	238936	374046	75564	1385024	682634	519101	919617	231641	3087796	185825	24650	179119	101324	111491	2171378	60539	3216111	276058	81897	2271895	92463	2182957	449238	1138346	22595	171872	4242	739256	79686	97	2889	571	1339	115129	443
Metabolism;Carbohydrate Metabolism;Glycolysis / Gluconeogenesis	555007	100370	523518	438602	3282	249247	15424	281298	484277	422059	1182013	281368	271979	98342	350740	578205	305623	822770	900624	516670	829333	360775	2180787	275246	51266	285117	102147	126832	1333063	250939	2165836	434136	225218	1356952	305661	1293272	543657	1327988	58395	331315	5489	1077222	601119	474	2396	1544	3917	130394	2673
Metabolism;Amino Acid Metabolism;Arginine and proline metabolism	544979	121750	373509	700199	4101	214609	12496	291814	504615	448728	1365084	236023	301786	99119	461890	609711	296717	770179	1174175	510109	710713	293382	1684444	262694	63148	348175	99645	134392	1245902	224977	1981033	182728	199542	1245471	385020	1196295	579313	765123	69769	284213	5215	809371	708491	594	2392	1881	4374	120783	3252
Metabolism;Carbohydrate Metabolism;Pyruvate metabolism	550407	107499	436210	616513	3491	235065	13431	293405	442942	419021	1188406	247294	286645	93994	358576	586410	297415	673686	909766	536452	784776	323947	1597461	260326	49611	283986	95527	117714	1097788	239439	1865635	254699	202116	1099349	350864	1059963	589038	875435	62621	308673	5057	943647	680079	498	2107	1645	3948	134542	2857
Unclassified;Metabolism;Others	451873	98794	553467	487094	3329	207101	10957	260597	478635	404391	1085027	228541	247749	90099	370305	598722	266144	752142	961061	475348	796585	290442	1647568	249991	62279	286086	96477	128701	1218197	209132	2051999	161956	159642	1234637	315176	1190117	552048	684897	58793	298562	5045	917933	572936	462	2148	1622	3488	136441	2739
Genetic Information Processing;Translation;Aminoacyl-tRNA biosynthesis	573314	93557	430118	784944	3338	272619	17491	294537	335786	423047	1144898	252077	308087	92956	231528	520230	322702	617962	557337	540487	616118	329290	1745437	258760	51665	208983	84002	94757	999288	266603	1666525	456327	241718	1003920	369106	940767	521440	1319558	60063	340726	5335	1068879	604209	485	2133	1426	4032	96882	2555
Metabolism;Energy Metabolism;Oxidative phosphorylation	644931	144221	409815	709093	4984	234504	13725	335545	370767	475771	1473857	225117	310552	93297	334190	672293	311163	464735	807872	532809	782110	347292	1136398	290019	65070	273176	95588	110980	750620	237145	1526798	232153	232773	750576	405600	738131	625769	731059	66899	305420	5040	802183	847655	647	2018	1959	5091	140086	4150
Metabolism;Carbohydrate Metabolism;Fructose and mannose metabolism	307807	51525	630216	179427	1845	115394	8047	141545	446607	308405	659797	229266	172016	70486	253016	439404	147642	943686	678550	420654	652643	220653	2177995	195585	40788	198754	85739	103761	1516131	119623	2264557	252983	118553	1552711	165676	1479133	371763	927821	33623	212387	4046	772066	285954	283	2280	1014	2362	91515	1469
Metabolism;Energy Metabolism;Carbon fixation pathways in prokaryotes	516358	108222	265438	758390	3721	234269	12708	302286	399550	407883	1149988	229080	293653	85416	294932	515259	291214	666666	726027	524150	752103	290755	1386615	249739	41224	234524	91037	93698	1048820	231846	1809698	139321	181197	1074053	372671	1042221	589382	605697	61881	281574	4873	820852	702436	498	2090	1589	3861	129309	3046
Metabolism;Energy Metabolism;Methane metabolism	469596	101536	363605	571640	3251	181508	10556	260457	425675	407785	1076619	215780	247039	80050	337881	515718	245942	686610	851921	523527	718875	268749	1498986	229674	44007	257937	88460	108089	1116963	190386	1924117	165154	150229	1113552	304453	1079857	551934	673273	55191	246317	4393	701497	515586	457	2077	1549	3267	121076	2542
Genetic Information Processing;Replication and Repair;DNA replication proteins	507823	79045	373493	545729	2780	224413	14702	298107	355746	430236	1046344	241869	256492	83465	257817	466818	270333	505677	645607	525780	779528	339665	1529081	220336	46636	216039	77003	94831	849512	220063	1691097	429114	224377	827945	311535	803760	635494	1220399	53202	289329	4717	915235	563605	399	1799	1379	3476	123360	2279
Metabolism;Carbohydrate Metabolism;Butanoate metabolism	457475	103005	285680	311715	3326	257762	11546	291187	391235	353941	1100590	184092	219154	84948	314357	509822	316915	591188	793316	402876	668650	278327	1273884	255883	38654	245668	85798	101827	933654	253358	1621044	100903	151170	986561	273553	944774	534248	444481	54257	299950	4731	913209	700763	421	1755	1452	3568	125085	2753
Metabolism;Amino Acid Metabolism;Cysteine and methionine metabolism	381684	77475	286229	471511	2750	180495	9729	242836	409403	372214	870155	197822	221081	77127	314551	402967	226987	659338	819943	428419	611581	223677	1399955	198861	47946	240203	76829	100688	1076209	180565	1766746	123560	138770	1074165	268793	1033089	513523	565688	50080	232066	4271	706408	548571	375	1907	1314	2917	100905	2137
Genetic Information Processing;Folding, Sorting and Degradation;Chaperones and folding catalysts	454041	94082	279220	660691	3161	181610	10683	300635	375096	378477	1025098	206631	251414	76069	321421	474612	234626	475494	817213	474431	771669	280937	1067088	203108	59505	247423	77079	98319	765654	178456	1502102	167120	186682	762853	340275	761596	614117	602350	57359	235108	4207	665127	696091	461	1678	1457	3387	131794	2589
Metabolism;Metabolism of Cofactors and Vitamins;Porphyrin and chlorophyll metabolism	401136	90366	137876	369318	3239	316674	14034	218231	323268	409609	1079595	168418	205154	92743	224035	389187	366057	636521	553246	332418	486844	233365	1323425	237116	50768	198339	80079	72957	1053150	302758	1756363	81142	114466	1059890	269697	988021	463580	455692	51242	334931	5895	947552	551682	530	2152	1486	3870	87480	2483
Metabolism;Amino Acid Metabolism;Alanine, aspartate and glutamate metabolism	404874	87590	263676	547870	3051	234825	11828	267450	345848	373348	981150	179802	228412	81120	274759	439582	288504	521721	690557	382566	639789	253471	1110613	211282	47763	220907	76193	90045	859092	230778	1558250	112466	142527	854894	303652	822854	506899	497183	54278	281726	4609	849926	584217	437	1736	1373	3409	113398	2421
Unclassified;Metabolism;Energy metabolism	359712	85041	225716	423191	2761	102244	6837	266797	395182	364788	927447	193247	198078	60972	299082	442534	155579	580676	758981	456547	771743	246250	1267754	177440	48810	217613	73933	84936	939491	107520	1768872	133006	137424	934691	245842	937291	702422	559623	43856	152895	3298	340735	475014	403	1703	1332	2438	124496	2323
Unclassified;Genetic Information Processing;Translation proteins	396872	74210	298537	445550	2574	157283	9662	250536	345216	371233	875055	200474	211232	68299	251919	411238	198867	512362	631346	465940	681597	250786	1232645	176754	57603	200272	70328	82675	837323	157208	1593155	211932	158145	833315	260003	817622	567451	697110	45069	213423	3976	628007	518274	399	1696	1234	2968	109875	2062
Metabolism;Carbohydrate Metabolism;Pentose phosphate pathway	346490	64369	318299	311006	2275	159974	9350	206485	384932	303637	758109	172504	161886	66802	356734	357510	201916	482773	943695	386984	585468	228686	1219849	168723	38302	267470	65714	114495	804150	159492	1422337	220236	131110	795967	213830	768248	450031	708381	45850	213437	3642	685190	393367	320	1485	1140	2547	96504	1874
Genetic Information Processing;Replication and Repair;Homologous recombination	399732	65634	291481	459880	2313	210036	11865	249491	285829	343210	821601	179384	203836	70160	200120	376368	245628	442952	495886	434548	579186	251909	1145761	188598	38855	170405	64736	76095	724838	203251	1380378	243208	157105	727868	259841	697000	496522	748517	44747	259281	4191	818545	492664	349	1533	1060	2942	96130	1837
Cellular Processes;Cell Motility;Flagellar assembly	288166	72705	80972	860476	2453	27440	4215	155119	367695	189913	707366	206536	235749	50599	240146	275439	69065	671608	600059	519697	700548	167304	1205334	116391	17804	155001	66386	58700	1092434	34572	1563494	28330	97956	1036968	271879	1048543	464168	415608	39585	55946	2229	31299	334948	316	1653	1086	1693	103069	1962
Genetic Information Processing;Transcription;Transcription machinery	401595	89913	238460	366784	2898	184386	10001	202603	260606	329721	922523	161433	207257	69368	187451	404155	224868	470463	451502	373835	447143	210956	1141019	191792	41756	155357	65894	64516	780817	178250	1293522	189524	147238	772216	235649	731974	378409	629776	41930	224334	3628	618244	509592	394	1519	1317	2715	74559	2585
Metabolism;Amino Acid Metabolism;Glycine, serine and threonine metabolism	396326	90136	249499	432643	3054	194428	9465	258286	323218	314571	962576	145378	194691	70174	311927	455587	258462	366323	797710	362621	583866	232428	752619	197534	45815	243587	68197	94707	598044	198379	1180011	60452	128290	602473	275635	588889	473910	301553	51446	241631	3871	717144	577211	427	1377	1304	3478	109999	2445
Metabolism;Carbohydrate Metabolism;Propanoate metabolism	443609	96112	240068	396462	3150	221125	10684	237410	267438	306293	1029095	142694	208496	71337	262802	478007	281468	343838	648551	335849	517241	245231	818121	212108	36661	210570	66996	80472	544079	221366	1049610	125682	155576	573261	273464	549472	390243	427865	49945	261282	3796	760449	642612	408	1285	1321	3384	102441	2555
Metabolism;Carbohydrate Metabolism;Starch and sucrose metabolism	252545	52623	268182	148324	1850	130351	7039	154057	335920	266157	610846	152582	134772	60593	227185	298378	163719	596069	605150	289231	477616	169294	1333084	152147	37995	177983	63187	77577	998151	131079	1539364	126869	84611	983283	144209	939201	318834	535433	31715	175286	3305	605919	304120	260	1592	959	2052	74064	1636
Metabolism;Carbohydrate Metabolism;Citrate cycle (TCA cycle)	373622	78951	248293	532169	2588	174312	9506	217565	271733	252854	808111	166092	205867	59771	204656	387452	214100	429683	510341	345895	516318	217759	937115	191548	27349	167994	64063	71406	660293	173671	1122627	127165	133941	694290	263641	669887	406058	460281	43898	212240	3448	631748	499665	351	1392	1008	2823	91389	2096
Genetic Information Processing;Replication and Repair;Mismatch repair	344476	57444	259138	421132	1991	174001	10004	207056	254199	306726	716560	158613	181081	61130	170497	327151	203766	421091	422631	385203	487616	211194	1050184	165538	29563	143204	57141	65744	690057	168379	1269234	204868	130865	688392	225422	658263	442801	650012	38319	216504	3562	681598	398793	287	1385	980	2400	79996	1634
Metabolism;Energy Metabolism;Nitrogen metabolism	326479	73611	225980	577860	2447	153405	8372	216567	300601	255923	805034	156434	193609	59634	275859	391878	204750	377512	719521	334654	668942	231959	780389	162065	46946	207624	62578	80731	616344	153340	1196672	79582	118464	604812	276990	608768	454553	389133	47740	200181	3263	537275	442290	325	1216	1094	2335	117700	2011
Metabolism;Amino Acid Metabolism;Lysine biosynthesis	280983	58534	209293	445372	2081	163730	8023	183646	292737	271789	644726	143031	178881	60992	200167	310764	199044	512990	505120	345384	462778	166541	984216	161730	33739	157955	60119	68972	827441	159502	1348063	35305	88564	833048	223840	798261	399461	300210	39334	200159	3526	606269	403817	309	1498	951	2405	79040	1646
Metabolism;Glycan Biosynthesis and Metabolism;Peptidoglycan biosynthesis	306902	58211	303256	379482	2054	150460	7513	206519	282956	290971	679625	144704	177118	62506	192661	351042	186371	471213	483193	382039	487012	174793	914011	163817	38527	152709	60893	71798	781523	150034	1329647	43002	92565	769685	216470	741048	407955	281959	37687	202527	3431	671776	424131	290	1436	1014	2501	84962	1679
Unclassified;Genetic Information Processing;Replication, recombination and repair proteins	330496	69153	303281	310720	2493	103598	6522	220561	312966	298611	820499	158982	161265	48640	244478	340947	142477	319021	624903	368513	788806	251087	792519	142997	41462	184913	61746	80844	521501	108767	1303075	146658	118272	519837	208364	545238	505865	473662	38215	152434	2842	467868	399113	323	1102	1086	2309	133258	1851
Unclassified;Genetic Information Processing;Protein folding and associated processing	346518	79375	190103	485081	2612	155981	8645	233247	285122	255619	869211	143262	178630	57113	273298	374090	202002	333735	691537	329098	592609	223463	758500	156479	38670	209337	60450	78827	526397	153635	1063597	113403	127998	537921	257293	538165	434834	431682	45883	193299	3314	543519	460397	382	1240	1181	2817	104549	2188
Environmental Information Processing;Membrane Transport;Bacterial secretion system	370203	78203	184067	519483	2669	156731	8657	240065	257518	272732	878129	154126	188728	57455	250335	382413	205197	228009	642850	362317	806653	279065	570860	164389	45683	190809	59700	70249	365927	148590	1066166	135741	150907	363261	278813	397766	478246	437250	46607	193713	3206	542946	545586	336	973	1206	2698	139915	2178
Metabolism;Amino Acid Metabolism;Phenylalanine, tyrosine and tryptophan biosynthesis	310779	69268	170665	528870	2418	175387	8810	204183	266825	256380	722145	132073	179838	61489	231161	327323	213867	373583	584009	307282	456914	177849	730519	152393	41503	182213	56300	71470	613554	171567	1044806	50774	110608	604245	256565	582546	356728	300129	44844	209327	3462	553697	481316	342	1260	1033	2586	82763	1872
Metabolism;Amino Acid Metabolism;Valine, leucine and isoleucine biosynthesis	333028	70851	194090	452441	2399	175915	9120	194115	228033	261626	753254	126328	170941	58306	192744	332841	213833	313527	475806	300175	460816	199302	720826	159709	39156	158435	55069	63451	513974	173541	975078	114818	120037	511805	234399	494365	371344	417520	40798	211123	3347	611258	459103	329	1157	1020	2705	83839	1883
Genetic Information Processing;Replication and Repair;DNA replication	309830	46732	227655	363731	1621	168369	9964	182163	202736	246432	619905	142474	158461	52927	136854	278966	194074	325311	339677	321410	433003	202859	939527	143195	25853	121155	47679	55565	529151	161902	1003951	246568	130800	535486	197681	508917	363627	712952	33643	205615	3188	655357	346357	245	1133	772	2180	69887	1327
Metabolism;Energy Metabolism;Carbon fixation in photosynthetic organisms	263300	47870	158568	335545	1707	111160	7409	145180	239616	203264	570803	134360	138691	46084	201659	235635	137834	357237	523861	268023	412627	167781	924246	119294	26910	159213	45538	64262	590939	109698	986601	190881	107332	578159	174363	559856	292238	601056	31923	138903	2566	444400	269931	248	1131	787	1979	64238	1392
Metabolism;Lipid Metabolism;Glycerophospholipid metabolism	272746	49741	220616	316903	1665	96633	6481	163389	220784	227959	585240	139469	143468	43747	158670	293163	127158	337237	401087	298292	482988	180907	866128	121853	23377	126323	47267	52859	547624	98005	1034078	176832	112437	546345	173339	539160	390083	549667	29285	135804	2379	386472	322768	223	1058	833	1748	76764	1410
Metabolism;Lipid Metabolism;Lipid biosynthesis proteins	358979	83609	238030	322733	2805	126140	6937	184535	220222	267835	849556	115235	168636	52783	226829	400368	174762	246568	558627	294871	414446	187320	589015	160885	36086	177670	52716	69225	402589	133065	829930	103006	123710	403897	214555	396698	333083	334251	38580	167728	2671	465507	490376	374	1030	1166	2746	80071	2273
Metabolism;Metabolism of Cofactors and Vitamins;One carbon pool by folate	248175	44912	165527	290235	1635	151318	8042	154423	191852	211470	552967	116658	134330	48966	124527	250000	177848	354085	309451	243707	348112	154198	836834	130375	21002	109136	44810	46435	572753	145818	960434	128105	95716	583381	169702	551387	274683	440984	29477	177977	2907	573649	339295	247	1121	744	2074	57649	1312
Metabolism;Amino Acid Metabolism;Histidine metabolism	248881	55269	100747	303257	1859	128333	6680	154019	213540	254865	629817	106218	145981	48613	168116	258562	164128	353200	418195	226229	350333	141882	762229	123266	28875	133244	45797	49941	577883	129281	1015719	70040	95203	576138	179034	553719	327979	327669	31842	151219	2742	467628	382624	278	1143	848	2143	60395	1492
Metabolism;Metabolism of Cofactors and Vitamins;Pantothenate and CoA biosynthesis	268503	54150	180819	391272	1927	137118	7718	161540	209891	228309	604187	117890	145812	47517	178809	272669	168092	289476	449499	249854	397624	166567	695967	126874	28694	143590	45737	58833	469133	135020	891857	125634	104465	470696	195821	454828	327623	427240	34461	167907	2765	485438	353578	266	1019	816	2107	69053	1468
Metabolism;Carbohydrate Metabolism;Glyoxylate and dicarboxylate metabolism	298190	77116	165486	317343	2449	113087	5555	183129	239372	228937	803063	103923	142282	47197	257218	353998	169462	245073	661260	250937	507526	184559	490064	143356	31882	190656	52222	71432	394119	119724	884510	27581	96181	398761	203318	408777	363870	173735	37826	146758	2480	386270	433078	294	943	1115	2371	95432	2021
Metabolism;Amino Acid Metabolism;Valine, leucine and isoleucine degradation	397062	90090	224114	130874	2880	242709	10244	197201	155565	239214	962638	77342	147378	64441	201749	438215	297463	157939	484438	205963	272928	201430	477474	196136	31201	169011	51253	64123	241198	236218	520036	104340	138788	292244	206324	255611	219809	277537	41201	274129	3373	756785	643427	371	837	1162	3177	68395	2435
Genetic Information Processing;Folding, Sorting and Degradation;Protein export	288081	49141	201135	410550	1757	161469	8810	163388	176566	231113	578365	119004	154724	49853	132579	270522	188912	274628	324722	286733	351263	168609	687522	137612	34483	115912	43660	52445	445077	156124	839682	148993	107390	448573	200915	423587	306025	465993	33598	194673	2960	610789	353285	259	1015	756	2187	61597	1364
Unclassified;Cellular Processes and Signaling;Membrane and intracellular structural molecules	293725	70341	141788	405891	2387	70653	4391	211404	282415	238561	726950	121013	147985	41058	323748	346857	119033	159794	852388	300375	638938	195378	324660	108416	43434	227955	46823	83133	247612	72025	784965	44336	131372	246966	235240	289637	444580	195053	42125	107010	2016	246891	567822	274	718	1079	2057	113027	2096
Cellular Processes;Cell Motility;Bacterial chemotaxis	251191	65989	88685	478403	2309	27361	2792	107716	267981	192094	662605	119854	165545	40414	252426	276476	72180	386089	635784	333609	364905	104320	713180	90803	27188	163176	44425	59084	653125	35563	956023	21688	77228	598074	186003	598525	288658	275582	32334	54904	1479	59675	288042	278	1061	1121	1249	56389	1814
Metabolism;Metabolism of Terpenoids and Polyketides;Terpenoid backbone biosynthesis	268211	47058	204873	313003	1696	151380	8403	146166	167607	212413	563590	109758	136394	46965	117979	266071	179736	301524	286221	244264	298529	153334	780739	128147	21746	105698	42591	46111	484300	148232	835087	158955	103784	498404	171561	464757	244105	496530	29643	183611	2808	591036	328927	247	1025	745	2075	51651	1328
Metabolism;Carbohydrate Metabolism;Galactose metabolism	187381	32793	297086	80383	1088	80886	4736	79700	207090	207224	405929	111540	86339	40197	115948	228712	101691	390296	309825	248492	403526	138646	924921	105696	17631	95013	45116	49060	658934	80985	1147263	120518	61807	647708	90730	624748	205323	431843	18457	127570	2204	518489	182295	155	1040	655	1397	62360	1052
Metabolism;Lipid Metabolism;Fatty acid metabolism	328091	74325	129306	116562	2397	178974	7738	190284	188300	213162	779330	85742	126382	53536	198455	347366	226149	209614	487589	209984	386854	189993	536343	167800	28692	159449	47798	59212	331091	177543	691492	79799	113981	364658	172742	349534	268282	252010	35108	198267	2801	561019	526137	313	809	979	2514	81360	1994
Unclassified;Cellular Processes and Signaling;Signal transduction mechanisms	209026	51340	199000	144715	1557	77773	4176	143359	238170	205321	523368	114005	103837	38603	183626	271502	105970	322340	474256	254345	517975	160450	715291	107088	28019	135838	47131	56684	529600	78771	1062270	70790	70247	528952	125090	533056	351871	297506	25169	114024	2184	313961	276113	251	980	775	1491	85776	1220
Metabolism;Amino Acid Metabolism;Tyrosine metabolism	197307	44016	140622	151934	1402	84859	4093	141728	212935	172651	480761	90772	107908	37686	171744	234315	114651	321555	441715	218694	381066	127108	666924	107486	19926	127715	41558	51643	519054	88052	895306	36390	67306	528200	125863	518072	286640	209694	24773	110288	2020	354669	301104	186	881	643	1462	65548	1240
Unclassified;Cellular Processes and Signaling;Sporulation	91804	5901	44328	29287	127	13296	1114	9586	185853	225335	171327	112486	104876	33576	6280	51103	15070	638675	8924	314342	126045	10488	1241318	64266	3377	4354	32932	7237	1090194	24412	1487808	23721	2776	1034994	17556	980011	208497	278455	2652	24601	1502	48394	10650	55	1383	462	157	3137	104
Metabolism;Lipid Metabolism;Fatty acid biosynthesis	248311	56072	228002	342563	1967	73973	4275	125840	190467	210903	562036	94209	140381	38574	177253	291093	106410	248282	442992	271009	316845	119964	470064	112060	25886	135093	41384	56260	401934	81678	756855	31834	77034	397107	173560	389890	277797	166329	29298	113484	2000	342632	322854	271	903	801	2000	58536	1542
Genetic Information Processing;Translation;Translation factors	236354	39347	157624	304060	1424	108191	6863	134087	152580	192794	479858	104231	121689	37755	115271	206326	128029	227986	284564	248582	319057	145337	647865	101660	22049	98058	35091	41832	373430	105309	722914	173931	99308	370449	151693	356373	266103	501557	25441	134387	2200	417144	272650	211	839	644	1693	51547	1104
Metabolism;Metabolism of Cofactors and Vitamins;Thiamine metabolism	194763	35431	170651	230604	1323	107350	5705	128012	173481	171951	419358	99551	106366	37459	115157	204086	125739	293713	289601	205366	296069	118266	667922	97468	15582	94950	37169	42458	474368	104483	810518	91543	68561	482819	129176	459926	245651	325882	23178	132095	2233	392826	233754	190	910	593	1492	49244	1046
Metabolism;Metabolism of Cofactors and Vitamins;Nicotinate and nicotinamide metabolism	207732	39413	130485	215196	1363	124334	6596	155239	175162	180322	465406	96751	99008	37255	147582	201003	147496	201207	381267	211991	380370	151194	545051	100321	22653	119407	35393	48730	317751	119591	720018	124271	86349	336066	142221	329176	327994	366531	26788	144186	2334	432493	297018	216	750	604	1624	65775	1073
Metabolism;Metabolism of Cofactors and Vitamins;Folate biosynthesis	212508	45214	146950	290602	1535	134366	6532	139195	159669	172645	499285	93880	118057	40618	125485	231378	159962	244345	310525	182497	325081	133097	523251	108247	25935	104042	39305	42257	377916	128851	710546	57940	79082	402646	164888	385176	245344	236540	28374	157409	2471	466915	333030	228	848	640	1831	58498	1231
Metabolism;Metabolism of Other Amino Acids;Selenocompound metabolism	189837	35675	166222	228646	1286	89902	5216	111246	172949	148244	401251	98131	102862	35341	122564	193743	109609	293054	316668	205279	284932	116057	687400	94514	19926	98910	35440	43972	473583	88313	753337	103372	72771	478756	123431	457716	233372	357111	22280	116751	2019	345997	238618	183	866	565	1440	46142	988
Genetic Information Processing;Replication and Repair;Base excision repair	230906	40709	177856	234727	1398	117310	6564	124953	141170	177362	472141	90456	109329	38705	114503	232283	143450	203679	289037	207450	290743	140357	569724	110141	19770	98446	35029	43730	335561	116419	647642	139977	90551	338281	141991	320954	227643	408135	25101	146241	2192	444006	292769	201	755	668	1693	51315	1152
Metabolism;Carbohydrate Metabolism;Pentose and glucuronate interconversions	181565	35408	168318	112693	1165	49271	3550	87357	206697	157481	394216	86940	82648	35033	187979	191386	71392	282555	510275	173031	259263	100890	704810	81613	14767	140384	34226	56606	493065	55189	744829	117503	71869	462239	96905	445208	195561	392333	21096	79462	1517	325420	210083	158	781	624	1281	40429	1051
Cellular Processes;Cell Growth and Death;Cell cycle - Caulobacter	232668	44138	171757	235499	1736	102014	5629	126095	140799	185935	527827	85753	113711	36311	98842	237682	129356	240269	236260	225469	254050	119251	566977	107220	24632	85224	35580	37905	386827	101108	696077	91650	79191	393525	139070	373538	223175	304832	23087	129612	2129	388682	278141	202	854	694	1871	43522	1367
Metabolism;Amino Acid Metabolism;Tryptophan metabolism	286588	62186	131001	147689	1995	148993	6957	148711	138826	171307	672907	70298	111048	43260	180320	301503	192476	103655	450715	162190	279869	161370	362200	136122	25444	145503	36531	53261	161898	149539	403494	105549	108902	185941	156903	174729	202266	284074	31211	171611	2240	467991	446816	267	566	817	2139	61082	1647
Unclassified;Cellular Processes and Signaling;Pores ion channels	213624	52171	98371	301210	1662	45844	2751	163953	217952	197858	566827	83166	108907	31429	275305	260788	89413	112932	724562	207088	481021	139777	217856	70033	36673	187539	34312	64731	176334	47461	603091	17749	112298	174448	185850	209218	340878	105135	33534	74691	1387	141380	493461	180	510	796	1374	85026	1632
Metabolism;Xenobiotics Biodegradation and Metabolism;Benzoate degradation	233661	55013	128157	121382	1620	121244	4986	124243	149653	172731	581686	59097	107637	41336	152099	285413	159768	227355	386287	139095	173193	106806	478897	127353	20933	119075	36179	46924	361754	123351	569673	20355	81353	384504	131640	356178	146732	125845	25847	144137	1972	423448	400023	195	690	735	1578	41717	1491
Genetic Information Processing;Folding, Sorting and Degradation;RNA degradation	209118	40729	146387	282276	1470	92340	5330	127945	148641	163507	452369	88948	111973	34684	116202	214144	115113	207381	286747	206041	294717	121434	490431	94538	26560	95872	33567	39834	337674	91865	626473	89541	79217	335736	145346	326087	234789	299052	24360	118283	1980	342535	276311	218	763	632	1641	50852	1174
Genetic Information Processing;Folding, Sorting and Degradation;Sulfur relay system	168206	37811	97843	229393	1226	88752	4528	114624	170610	139280	413849	90576	94011	30935	138452	181822	110242	238636	350714	176967	354888	121028	508625	87602	16783	103707	34827	41220	373312	86605	717859	49143	56656	387817	127759	384248	254084	223188	23264	106540	1887	300950	210408	168	727	520	1246	60320	945
Metabolism;Lipid Metabolism;Glycerolipid metabolism	180356	30977	152097	106460	1003	55454	4057	77411	151903	164722	392476	88716	85428	29329	115974	182731	76124	246017	297798	174343	257541	109764	682005	77801	19118	93204	30547	37529	408621	60811	714627	147367	75006	404057	87758	389517	188381	438789	16821	82308	1534	249195	187177	147	751	531	1199	39316	834
Metabolism;Glycan Biosynthesis and Metabolism;Lipopolysaccharide biosynthesis proteins	183454	50333	58051	558519	1708	31035	3255	171132	216268	137947	492696	111568	125168	24766	255274	217419	62533	63834	668292	237135	594595	157848	66992	62182	29351	177575	32847	60717	92705	32300	520484	25672	85797	74834	221243	132699	429850	114636	35237	53135	1322	96161	294151	233	462	724	1463	103686	1371
Genetic Information Processing;Replication and Repair;Nucleotide excision repair	178144	30879	118904	244382	1051	96207	5624	97646	109202	138648	366715	79030	97008	31187	66175	165438	111773	222401	159290	174756	194890	101047	568634	86749	14968	61020	28202	27794	358930	93255	583711	118670	70149	362967	117755	339457	166936	367936	19215	114657	1811	348953	199121	154	720	494	1245	31580	834
Metabolism;Metabolism of Other Amino Acids;beta-Alanine metabolism	215000	47607	79257	154322	1556	134286	5973	121609	134010	141544	512650	61025	91804	37667	151974	217763	164785	140556	382617	146567	243169	125018	347893	110295	18540	120795	31444	44721	219312	131018	449838	53895	75475	241904	132790	228324	185978	177550	26704	146223	2063	413998	339765	208	569	633	1707	52174	1206
Metabolism;Glycan Biosynthesis and Metabolism;Glycosyltransferases	161879	36741	120820	206944	1249	113365	5041	131100	159157	128419	383504	73581	79604	34202	148094	182914	135604	146094	387247	192682	360193	126706	289915	88190	18131	112690	32053	47021	248645	107039	558342	20529	51423	244816	131344	246185	277708	114200	25586	134429	1999	435238	254118	159	537	590	1291	67150	1010
Unclassified;Cellular Processes and Signaling;Inorganic ion transport and metabolism	158076	38653	70429	185854	1231	63019	3325	108432	172287	114217	371641	80970	78032	26509	162477	169763	89329	197115	431260	180086	363928	115223	433466	75505	20549	116793	30931	43645	311883	61795	608094	46910	62870	318875	114682	325738	233240	201001	22196	79230	1470	199167	253572	153	567	525	956	61290	956
Metabolism;Energy Metabolism;Photosynthesis proteins	185308	30495	118296	245866	1530	81058	6023	96949	102469	146152	388669	78103	101500	31511	73898	162563	100809	168590	171671	122871	210320	111085	512094	77263	52350	88121	27345	28430	272523	92409	494858	148005	81068	273277	128323	258130	172361	430263	19748	102225	2555	306506	191363	347	998	563	2573	33465	1002
Metabolism;Enzyme Families;Protein kinases	179109	44972	113042	141203	1399	68507	3126	131043	161235	137535	441847	69854	80188	28778	176045	204614	94087	121660	459058	170646	362036	121765	272809	79954	19096	124010	32251	47607	209222	68541	518228	30530	58848	200042	114547	213915	276953	140853	23693	89989	1450	280974	261927	163	471	687	1144	66118	1012
Metabolism;Energy Metabolism;Photosynthesis	171474	27870	112025	243142	1330	79169	5812	90225	96646	138108	361799	75281	96847	29730	66289	149574	96172	168307	154462	116550	193947	104455	508906	74358	42759	75867	25544	26553	272025	86157	481207	146304	77867	272346	120746	256137	161062	428160	18643	99107	2275	303688	180522	291	903	513	2208	30302	892
Metabolism;Metabolism of Other Amino Acids;Glutathione metabolism	197429	42365	104843	175768	1508	76299	4036	133139	139239	147058	472088	62593	83355	29236	157970	213108	108416	87115	409216	174598	314719	121666	255969	77490	22498	120442	28314	43550	140299	77435	420265	66839	85165	145031	129487	154708	257887	194399	24034	96694	1615	258036	346146	188	490	656	1581	57536	1233
Metabolism;Amino Acid Metabolism;Lysine degradation	226459	50848	71517	133991	1684	143617	6173	121864	103469	141685	548892	52695	90911	37274	130756	228981	175271	84726	321635	124589	232450	129608	245002	111848	18524	108569	30111	38382	129940	139743	343912	53615	80166	153721	133436	143012	158182	155020	26164	154559	2049	432100	367600	230	470	679	1852	52027	1347
Metabolism;Xenobiotics Biodegradation and Metabolism;Drug metabolism - other enzymes	139890	18778	96512	50187	662	91103	5045	82745	101481	116643	278432	65551	55536	26263	75482	115553	102241	151046	196667	122475	190713	98349	505639	64699	15800	66196	21450	28764	256756	86178	475690	146640	64075	258929	66989	240349	162602	397522	14361	105629	1517	341335	168387	101	494	341	933	30023	574
Metabolism;Metabolism of Terpenoids and Polyketides;Prenyltransferases	157464	31553	134076	172625	1133	103873	5035	96778	100096	114870	342703	55646	76546	29378	78580	168544	120975	144268	191778	141907	179096	91644	334123	84560	18630	70895	26046	32416	233926	100904	425782	51913	47504	242092	104971	224066	150488	178724	19095	124575	1840	402278	189456	174	578	459	1426	34907	870
Metabolism;Energy Metabolism;Sulfur metabolism	144490	33648	93762	180647	1175	70575	3369	90460	126824	112284	338183	58356	76229	26705	117236	162992	91131	161123	300561	127887	221900	82029	314488	68575	16197	89110	26355	35499	262596	70213	461344	12888	49622	262948	105262	256743	165583	108400	19371	87949	1495	254434	236693	157	547	479	1210	40718	927
Metabolism;Metabolism of Cofactors and Vitamins;Riboflavin metabolism	145144	25430	56242	197458	931	77538	4718	85107	105742	105951	312285	69700	76502	23460	95117	130025	94216	126641	244532	116925	239590	102896	386225	63136	17362	77977	22026	29037	196971	75242	420376	113396	67439	206550	103844	202710	166509	321213	18302	87607	1450	244918	190511	134	485	386	1104	39725	721
Unclassified;Cellular Processes and Signaling;Other transporters	105281	22989	80995	105760	724	43674	2074	87159	141194	123337	254541	62666	58017	22471	100451	123937	56947	190426	260940	154931	289281	81018	375040	55745	12837	72608	24526	29979	315344	41328	613318	14330	42129	310751	79744	313314	224832	108571	14627	57827	1189	131235	199069	102	520	415	678	47529	686
Metabolism;Xenobiotics Biodegradation and Metabolism;Aminobenzoate degradation	189568	44836	133134	80892	1389	93198	3814	92709	104451	112226	441310	38252	79075	30460	124856	237119	124468	115362	313376	93196	119318	83604	256853	101245	17581	99639	26748	41780	180556	95984	283584	15666	62474	200841	101255	182363	98108	70066	20757	113864	1455	368942	323280	159	424	524	1399	33318	1122
Unclassified;Metabolism;Amino acid metabolism	92400	24892	151175	44068	876	34781	1733	48092	126417	90785	235633	57465	50901	19622	81918	138909	45065	258787	211772	115611	165070	52694	514659	60957	9068	62492	25899	28895	409362	35779	610687	10772	20556	425068	48226	405802	124740	114641	10427	57368	1196	157642	99542	134	650	373	798	25780	655
Metabolism;Metabolism of Terpenoids and Polyketides;Limonene and pinene degradation	181683	38438	84576	76356	1277	98626	4338	93132	93394	113609	399870	41853	73457	28898	101904	199746	124605	97159	248939	107803	154897	92981	266641	91287	15537	85397	23918	33005	152302	99190	292372	48450	65266	171219	96078	157438	125972	144656	19331	111795	1479	341760	289860	177	399	480	1379	36680	951
Metabolism;Glycan Biosynthesis and Metabolism;Lipopolysaccharide biosynthesis	142152	39530	35713	492554	1384	25487	2813	118197	127861	94240	366218	78740	102544	16313	150491	156478	46642	40733	383468	158167	384803	106156	22681	44933	22228	107313	22739	35455	46516	25793	310488	19345	65753	40161	175920	78288	283455	89876	25674	39968	959	46502	215987	193	351	524	1156	67633	1131
Metabolism;Metabolism of Cofactors and Vitamins;Ubiquinone and other terpenoid-quinone biosynthesis	153042	34716	113553	157616	1204	89229	3960	120893	115437	88020	348092	56014	67400	25270	124990	172790	108505	33499	320525	130746	322434	118159	72120	77523	25633	100054	25593	40147	50177	87417	290079	17486	46924	60058	112996	73841	220209	62847	21373	108787	1658	288328	227043	184	348	449	1489	63090	954
Metabolism;Amino Acid Metabolism;Phenylalanine metabolism	147316	38121	64407	88727	1194	40425	2274	80745	108758	103177	395612	43022	62244	20487	127273	165019	65448	115792	326247	102361	174884	77421	287610	65963	14658	93523	22756	33430	188137	45567	350848	43563	54923	189842	78538	188908	132055	147003	15931	54330	931	120633	216778	143	417	520	1067	33002	1081
Metabolism;Xenobiotics Biodegradation and Metabolism;Naphthalene degradation	114125	23226	86501	84981	771	50737	2262	54128	96461	89412	244932	40203	61132	21673	72451	140054	67245	188238	177998	85259	116484	51194	377727	61500	9251	55651	21449	24537	300024	52397	416804	10167	42893	310431	69682	292336	61012	95865	12843	65534	1039	232324	208672	93	475	352	804	22338	617
Metabolism;Biosynthesis of Other Secondary Metabolites;Streptomycin biosynthesis	113813	28365	107375	118702	1020	84823	3747	69139	96245	76440	279670	38587	53472	24992	91610	139048	101019	138733	232875	93487	122702	64044	279472	68565	12998	74354	22372	32576	225822	81521	339545	13886	30173	233460	79922	214570	93781	87664	16213	100968	1455	318751	154831	144	484	390	1112	25583	782
Metabolism;Carbohydrate Metabolism;C5-Branched dibasic acid metabolism	129479	30360	56535	173003	1048	68724	3209	83403	99829	99334	300991	46601	65020	22553	92431	131134	85725	106541	230317	118396	210254	79668	205194	62598	17305	72711	22669	27679	174726	68368	369667	12338	39701	173574	94240	173201	163142	83516	17088	80535	1311	220996	185609	135	419	417	1117	39678	811
Metabolism;Carbohydrate Metabolism;AscorMMYe and aldarate metabolism	94503	15741	80306	44481	503	23761	2034	61526	110028	72609	198814	52162	39395	15517	91527	94141	37201	166926	252317	109506	135446	56019	453157	40290	7309	70022	17052	27291	266807	26571	406444	91291	43370	273356	44530	262533	149333	270657	9933	37109	777	108719	99768	71	437	252	547	19207	409
Metabolism;Xenobiotics Biodegradation and Metabolism;Chloroalkane and chloroalkene degradation	131286	27804	92132	81498	911	28076	1967	51423	91961	98798	286898	41387	60242	18880	93081	139607	46778	133500	231599	87666	118763	58399	340221	55005	10524	68800	18758	27360	223719	33405	344119	58005	51474	217813	66005	209008	78527	191976	12502	43782	757	114393	176673	106	403	414	765	21201	710
Cellular Processes;Cell Motility;Cytoskeleton proteins	107612	20560	76269	166264	690	41901	2580	55126	78695	117851	247286	44447	67032	19826	63423	108098	53874	141917	156819	103106	100156	48365	315792	47670	9117	49093	16843	21595	243834	42512	407392	44427	41598	228008	77118	215403	115966	170912	12573	55595	963	142454	140607	92	463	384	696	16529	591
Metabolism;Metabolism of Other Amino Acids;Cyanoamino acid metabolism	96792	20982	106460	46815	682	25795	1858	45688	101232	85739	246988	41513	43680	17760	102902	119871	41760	131283	267616	81431	118475	53955	339058	48193	10531	75338	17695	31279	224415	30172	358210	56559	38075	216262	51348	207023	95112	185242	11168	44975	800	118012	116151	93	403	343	703	19922	632
Metabolism;Metabolism of Terpenoids and Polyketides;Geraniol degradation	158378	37550	51739	52773	1214	113699	4358	96669	67490	92990	389496	26235	56535	27599	101559	175754	137082	22406	248958	80987	163053	94177	78513	83962	13378	81080	20630	28630	31493	108461	163468	15252	57691	53321	93824	47433	118864	38033	19551	120835	1467	335343	310616	160	233	495	1286	40606	944
Metabolism;Lipid Metabolism;Biosynthesis of unsaturated fatty acids	130977	31513	64830	89794	994	69801	2892	85309	95663	96214	307925	36441	53202	21466	118770	141954	87949	43862	305862	110834	214123	83533	100398	60805	12275	88217	19417	33877	70246	67318	259467	14082	47373	78111	86371	83580	155552	50925	17740	81398	1153	219537	242610	143	261	429	972	42895	804
Unclassified;Metabolism;Metabolism of cofactors and vitamins	84573	20162	60875	116672	636	41506	2017	56512	102299	68019	217237	44286	47960	16474	94204	108127	55989	137426	245287	99624	154349	51844	267879	44827	12645	68032	18352	26930	214975	41433	362474	10235	26424	223249	66258	217454	123723	81130	12806	52946	920	149128	118590	93	404	297	654	26868	522
Unclassified;Cellular Processes and Signaling;Cell motility and secretion	114005	30528	62392	197267	1005	20523	1664	64180	82654	84252	287832	47265	63133	14590	83192	128453	36115	89116	208632	103925	195423	64577	183078	41629	12711	58571	18015	21304	139913	20104	297332	26049	48319	135737	89897	145064	130350	111186	14082	33939	663	62782	181316	114	328	440	730	32882	834
Cellular Processes;Transport and Catabolism;Peroxisome	131762	26522	65852	126990	864	77794	3863	77802	53934	80059	286287	40273	60653	20501	56313	131384	93937	47809	136514	80148	147770	80241	173227	61087	14569	50474	16664	19848	73795	75601	200014	62833	54903	83830	84175	78743	107962	168301	14909	87780	1167	245910	205099	122	301	351	980	29661	754
Metabolism;Biosynthesis of Other Secondary Metabolites;Novobiocin biosynthesis	58969	12948	26037	85288	468	30081	1696	41420	74085	53076	143213	37205	36796	12454	48934	58509	36894	134624	125244	71134	125155	40925	283581	33779	6313	37652	13906	15195	214499	29287	336134	23116	22304	217985	44518	211695	90713	109258	8208	35063	753	88101	80883	67	366	196	477	19144	362
Metabolism;Metabolism of Cofactors and Vitamins;Biotin metabolism	74637	15067	32672	184822	586	55904	2712	48220	56059	53452	165605	36350	49212	15298	42747	67737	62196	88849	106959	76554	127075	48514	159686	38290	10987	36774	13523	14837	135781	51872	243036	10836	28337	142297	76398	137288	87386	66439	12164	61036	997	173277	120813	88	317	231	680	23289	437
Genetic Information Processing;Transcription;RNA polymerase	80681	12458	63808	84829	459	38535	2502	42685	47332	63086	158574	36173	40996	12710	30825	75266	45473	80887	74723	73139	95863	50106	252728	36070	10293	29050	11702	13352	129637	37855	239452	73873	35794	133076	46847	125099	78808	204194	7892	48785	775	161050	86572	68	295	196	594	14895	336
Metabolism;Metabolism of Terpenoids and Polyketides;Tetracycline biosynthesis	73570	14151	65826	135489	505	14988	1122	35130	66485	67916	153187	35178	48472	11394	53030	82787	23673	102522	131579	96793	114479	34853	188376	29258	8213	39836	13384	15874	165195	18449	291366	10329	23797	161441	57197	160094	99229	63867	8776	27852	610	86128	91243	77	335	235	585	18981	413
Organismal Systems;Environmental Adaptation;Plant-pathogen interaction	76131	13019	37258	132229	484	22576	1698	35470	57426	62913	156389	36411	45129	11963	41652	60949	28885	102372	103600	92552	92090	36354	235711	29002	4583	31930	11548	12719	170359	23009	268208	42252	30057	161709	52329	156597	88927	145966	8143	29664	590	79034	88163	66	314	222	464	13712	379
Metabolism;Carbohydrate Metabolism;Inositol phosphate metabolism	90268	18844	114807	47604	661	48711	2388	47919	78164	51929	206076	19915	29916	15751	123582	118437	64203	22800	329306	59475	77968	52151	106672	45945	10474	90485	12206	38844	37750	49596	103392	41562	31937	44705	54225	38029	54098	102040	13488	67812	779	187484	120914	81	174	244	745	18824	504
Metabolism;Biosynthesis of Other Secondary Metabolites;Tropane, piperidine and pyridine alkaloid biosynthesis	57028	13168	17074	63238	422	21878	1314	39149	62521	53909	143366	32012	33842	10809	46982	60982	30168	114251	119928	58406	121201	38814	247298	31099	6553	35912	12388	12997	181119	23014	305377	21987	23318	184894	39659	181858	88425	95250	7304	26624	614	60457	85897	58	313	192	436	18928	349
Metabolism;Xenobiotics Biodegradation and Metabolism;Caprolactam degradation	109477	26408	38868	35370	858	76741	2939	70195	54551	63550	265994	19096	36432	18441	80912	120581	93718	2924	204726	60031	127424	67859	30016	58603	10561	64470	13899	24050	2447	73621	105636	11522	37630	16398	63229	15409	96716	21790	13859	81515	990	228621	202521	116	142	327	916	31280	689
Metabolism;Metabolism of Cofactors and Vitamins;Vitamin B6 metabolism	75058	16667	52163	67958	596	40489	1840	61883	63030	57713	175482	29463	33935	13144	61393	87007	50990	42507	156599	78059	150681	52232	88441	35930	9779	47802	12937	18379	71928	40602	207212	10161	23941	72413	51933	76064	113576	39168	9993	50177	762	152687	115326	78	213	231	671	28457	478
Organismal Systems;Endocrine System;PPAR signaling pathway	95269	20152	36874	22813	630	73723	3179	53861	31151	50780	206035	19640	32992	16540	33513	89614	83832	38899	77000	42930	63752	53147	143165	51370	9029	33345	11852	13354	60910	69961	119991	42375	34059	74718	46760	62390	52905	107518	9849	77116	956	226623	148985	89	204	233	745	16317	538
Unclassified;Metabolism;Lipid metabolism	62906	13472	53379	65280	424	14943	1196	32779	63380	56994	159064	26130	33678	10018	73922	76402	25325	59914	197092	62372	84390	35310	166332	24576	6429	53487	10095	20567	98881	16263	192254	40110	29029	96566	41858	95304	79137	114353	8337	24662	470	67122	82685	55	225	237	430	13947	323
Metabolism;Metabolism of Other Amino Acids;D-Glutamine and D-glutamate metabolism	60198	11268	44411	85878	391	37906	1775	40518	48700	58846	135670	26240	35700	12042	35562	61046	45017	80506	89158	68695	79175	32889	155798	31795	6250	29395	10982	12916	129580	36682	234978	8444	18720	132211	46249	124915	75793	50777	8004	45107	720	140556	83691	57	266	193	474	14531	325
Human Diseases;Infectious Diseases;Tuberculosis	76926	15192	55861	60677	584	38989	2100	37415	39224	55171	160702	24386	33086	11981	30944	71727	46418	60616	73953	61244	68173	39733	169514	35062	9593	27957	10820	12482	99165	37862	179527	39866	25904	101536	40859	93627	58545	118969	7427	47236	722	151250	84836	70	247	232	608	12301	458
Metabolism;Metabolism of Terpenoids and Polyketides;Polyketide sugar unit biosynthesis	59089	14979	54160	106849	548	38412	1892	33358	43072	36338	146149	22504	34249	12744	31835	70665	46321	82304	76379	50873	63509	30799	156492	32865	6961	27604	11673	11855	134102	36764	177600	6671	19300	134179	49654	124831	45259	54711	8220	47165	705	156254	86219	77	271	212	582	12202	421
Unclassified;Genetic Information Processing;Restriction enzyme	72326	12706	32549	154335	310	28317	2050	34219	26854	51043	142920	29792	41062	8961	13080	47587	31414	67818	26995	81457	72402	36423	187566	23037	7619	13183	8769	4592	104573	26126	180165	54272	32615	105480	54850	100776	60599	165059	7278	34912	519	95234	79653	49	219	144	291	10669	257
Metabolism;Metabolism of Other Amino Acids;D-Alanine metabolism	45555	8343	49233	56708	295	20368	1052	34830	53137	44900	100786	25546	27584	9166	27638	50507	25596	96036	69036	73945	97074	29107	186286	24646	5423	22091	10762	10545	155147	20814	261639	6555	11554	156377	30818	152349	77648	49974	5355	28482	552	83553	50845	45	258	149	353	15804	233
Genetic Information Processing;Translation;RNA transport	41226	9060	46772	104221	282	4214	597	24588	56125	38229	88570	30786	33259	8099	33301	48582	7727	99621	84455	71917	98251	23954	181942	17669	6452	24650	10178	10273	162330	6206	246982	6358	14582	156455	38473	155823	73312	56883	5593	13205	441	44711	48425	57	276	154	329	14802	213
Metabolism;Xenobiotics Biodegradation and Metabolism;Nitrotoluene degradation	39733	10463	10644	102582	323	4206	607	20594	57796	33121	97274	28915	29678	5677	37189	39835	10151	117580	90748	49383	86913	23178	217326	25260	3533	25394	10344	10652	179481	6317	264753	3185	11092	184632	34402	181899	61739	59840	5582	6393	342	7033	33323	48	281	126	260	13052	246
Metabolism;Lipid Metabolism;Synthesis and degradation of ketone bodies	68013	15653	30963	21766	463	55262	2102	32752	26231	44369	162676	16489	30659	14077	19300	77126	64653	74514	43868	27579	31185	30615	160910	39243	4809	19282	10832	7200	114276	52186	153112	7453	26631	129505	39127	114381	11551	38487	7341	59036	741	186653	148869	51	223	218	535	8617	432
Metabolism;Xenobiotics Biodegradation and Metabolism;Toluene degradation	86038	19664	34342	71264	629	33094	1486	57586	44700	49195	187103	23239	34189	10251	53460	92206	45010	6221	134431	62592	143360	54660	16207	38838	7169	42256	11486	16320	6873	34255	117101	8517	28149	11257	52216	20343	88482	22207	9318	40012	580	129797	134615	67	123	213	644	28748	553
Metabolism;Metabolism of Other Amino Acids;Taurine and hypotaurine metabolism	63186	12499	35669	61273	438	21385	1388	34718	45733	44567	138916	23260	28521	8707	49619	60994	29550	41731	126773	51467	80300	35585	130187	23688	5308	37314	8595	14233	68007	22732	145864	37400	25595	67873	37651	67198	60843	110319	7258	28025	439	95223	73807	49	165	187	400	14031	359
Environmental Information Processing;Signaling Molecules and Interaction;Bacterial toxins	47868	7752	48220	32237	230	11754	793	18142	36218	57656	101494	19139	24604	7839	19334	51264	17858	93845	44942	53487	23926	14111	208327	19318	5060	14151	8241	6909	152590	13087	231836	20933	16386	152730	20925	142333	38671	86176	3501	20098	367	63563	55313	25	235	172	205	2568	207
Human Diseases;Infectious Diseases;Vibrio cholerae pathogenic cycle	47573	9763	27590	81787	278	12305	802	31828	56148	40475	103567	24906	25547	7345	42084	49369	18715	61971	106509	56084	108141	29527	113610	17873	8203	28913	8816	11501	99398	12322	198905	4043	14834	96889	36572	100118	81658	62999	6246	18951	410	43293	62399	55	192	155	283	17733	222
Environmental Information Processing;Signal Transduction;Phosphatidylinositol signaling system	54980	9831	40655	34890	350	28720	1576	34488	38107	40325	114178	22307	22691	8493	32457	57931	34925	39857	82624	54135	94960	39889	130168	25848	6112	27485	8635	11760	62866	28547	157787	38244	21623	67713	30675	66987	70144	103826	5923	36148	564	113613	66980	53	174	139	441	16336	271
Metabolism;Xenobiotics Biodegradation and Metabolism;Drug metabolism - cytochrome P450	75963	19135	32881	51166	674	8516	523	39068	48236	52494	190471	12945	30988	8771	72702	93766	25204	21471	185084	37940	83851	32823	49667	25281	8265	51329	9512	17606	34688	12413	97148	3690	33225	33724	44750	39386	54271	20457	8470	16069	319	30832	155413	69	142	296	590	16800	544
Metabolism;Xenobiotics Biodegradation and Metabolism;Metabolism of xenobiotics by cytochrome P450	73257	17951	31950	50839	638	8018	489	38553	48446	51291	177493	12910	30344	8618	71438	86694	23169	21416	182600	36934	83768	32113	48638	23875	7946	50240	9087	17486	34642	11423	97068	3485	32867	33565	43689	39358	54189	20196	8244	14768	307	30182	153655	66	137	280	558	16619	512
Metabolism;Metabolism of Terpenoids and Polyketides;Biosynthesis of ansamycins	32942	6178	17988	77404	213	10923	893	13574	42346	35330	74334	21573	23369	6985	34739	28688	14571	79255	93725	41997	51219	17563	170513	15801	2485	26114	7041	9965	131254	11022	194569	20359	13190	125715	28792	120931	36783	83446	5006	14555	340	40095	28772	31	210	122	223	7174	177
Metabolism;Xenobiotics Biodegradation and Metabolism;Polycyclic aromatic hydrocarbon degradation	63058	14176	48134	39711	441	30880	1351	28776	30511	52161	148618	11758	28981	9842	33810	81481	40968	39842	83222	40611	23941	24277	85278	35514	6553	29501	8224	13308	65159	33470	122402	6634	16512	68660	33667	60572	34219	27415	6759	39190	505	131276	78764	61	165	165	439	9016	331
Metabolism;Xenobiotics Biodegradation and Metabolism;Dioxin degradation	25083	6583	33407	7103	189	3190	198	15641	52022	27562	67990	18665	13854	5931	37041	42751	6997	91252	102502	37926	50517	13349	181045	17048	3342	26402	7937	11971	150357	4116	210207	2929	5449	148649	11201	143596	37551	39602	3012	9189	267	33795	22637	18	202	119	146	8009	203
Unclassified;Metabolism;Nucleotide metabolism	17080	2834	21197	4620	107	9872	597	19615	51138	24222	44431	22635	9760	5120	38145	19588	11013	73077	107045	33903	83364	22689	169012	13396	1573	27080	6734	11628	116886	8874	204588	19099	7089	120261	10636	118741	58948	69488	3322	12732	325	41077	14413	11	167	68	106	12393	74
Human Diseases;Neurodegenerative Diseases;Alzheimer's disease	51575	10290	30439	128457	348	20406	1371	17507	23011	29660	115791	17724	34661	7530	20814	55557	27526	47849	48761	37385	29192	21320	104845	22702	3145	17550	6574	7408	70934	19903	92484	20199	21883	72801	45988	67422	24311	78917	6349	26320	382	69401	66110	44	174	139	406	5099	296
Unclassified;Metabolism;Carbohydrate metabolism	40280	11085	42911	9012	346	20992	877	26659	45182	35686	108120	12145	14752	8832	56116	58634	28261	37591	151658	23323	41841	21096	81360	23146	9014	41595	7678	16576	71440	22827	119470	3701	8268	64359	23192	59952	37079	26695	6139	28842	407	97176	43124	44	132	188	313	9395	302
Metabolism;Xenobiotics Biodegradation and Metabolism;Xylene degradation	19599	5236	22349	4934	120	2646	173	14422	43223	24272	51620	17884	12232	5088	21548	32109	4300	91098	59577	36212	50056	12193	179340	15076	2118	15709	7380	7484	150204	3471	208705	2567	3849	148178	8315	143222	37208	39034	1947	6972	242	22460	15692	15	197	100	116	7247	167
Metabolism;Biosynthesis of Other Secondary Metabolites;Isoquinoline alkaloid biosynthesis	28222	6389	8015	30714	211	2979	479	13617	39366	21351	70920	19282	17105	4509	29399	28445	7337	75104	76898	34883	50947	15642	169406	13981	3737	21344	6328	7758	118821	4382	163258	19367	12288	120151	17460	116967	31718	72864	3285	5528	233	4024	29088	28	184	92	181	6380	186
Metabolism;Xenobiotics Biodegradation and Metabolism;Ethylbenzene degradation	37930	7551	37425	35761	238	11427	572	18824	37316	30217	79971	14118	23281	6522	28828	50269	16518	57370	72795	34406	43047	16569	113108	18991	3324	21348	6987	10374	90519	13504	133195	3090	13740	93546	24023	89407	30712	30529	4288	18509	306	68310	62295	30	149	110	246	8134	211
Human Diseases;Neurodegenerative Diseases;Huntington's disease	49544	10361	20936	130148	349	12489	1049	22538	20799	34033	110822	19268	34729	6285	20408	52871	19965	29416	49420	37262	56722	25539	68122	19528	4405	16718	5906	6174	42895	12734	87102	19876	25173	41584	46780	43053	44683	70994	6099	17531	282	41302	81184	36	134	144	347	9647	307
Organismal Systems;Nervous System;Glutamatergic synapse	35318	7857	21157	31708	279	28099	1197	24210	28208	31398	99786	12417	17402	8402	29543	44345	34825	39584	75392	32617	39729	20816	81747	22473	3730	23302	6428	8959	68036	27550	117860	4611	9699	67055	25660	61701	37664	26756	5189	31798	454	93208	49209	39	143	140	319	8347	212
Human Diseases;Infectious Diseases;Pertussis	16980	5407	4565	9786	152	2524	137	61100	53784	22101	66028	23311	6291	3245	48010	33489	9564	398	134785	73388	219244	50294	4996	9725	7405	33066	7124	9374	1986	2561	174495	2556	9088	531	21274	24113	194599	3831	4513	6898	283	3899	38041	25	26	92	185	36832	171
Unclassified;Cellular Processes and Signaling;Cell division	31139	7793	17049	32943	268	11622	606	21024	32692	25826	80755	16660	16886	5761	22456	37847	16016	57209	56912	36844	59098	18207	112288	15862	3771	16768	6725	6635	90718	11313	145934	4320	11364	92773	21126	91198	41672	30205	3668	15170	312	32191	52741	35	159	110	249	9487	220
Metabolism;Metabolism of Cofactors and Vitamins;Lipoic acid metabolism	35793	6947	26914	8082	267	27607	1283	22627	27675	25710	76966	15388	13839	6994	20595	36781	30811	37629	52125	28094	59245	27116	104065	21110	3435	19045	6723	8339	57521	26175	115790	20632	13022	65194	19113	61353	41279	58711	4183	30908	493	94151	51178	45	145	89	365	10494	192
Unclassified;Metabolism;Biosynthesis and biodegradation of secondary metabolites	30348	7640	27791	59068	225	11458	605	29588	47847	20340	82162	14158	16251	5513	68954	50458	20050	4840	187485	37791	96211	29590	8365	15624	5741	47986	5674	18122	5717	12954	77236	2521	12413	6856	33221	14427	64882	13826	7090	18841	281	44906	46185	28	57	109	229	18614	186
Unclassified;Metabolism;Glycan biosynthesis and metabolism	28876	6844	9079	79874	238	3967	418	24786	42411	27435	74334	20712	18599	4294	46278	30245	7935	24683	123340	45307	99852	24734	39509	9355	6967	31024	5559	11438	38972	3802	123026	5908	12387	35882	32013	44294	74439	24936	5523	6941	207	4773	45910	29	99	116	190	16856	187
Genetic Information Processing;Translation;Ribosome biogenesis in eukaryotes	29748	4853	17011	30570	149	18972	993	19697	22745	22138	62181	14409	14985	5746	15311	27896	21736	39148	38360	29045	43486	19591	101238	15102	3511	12833	5116	5635	62174	17691	103463	20354	13426	64888	19757	61509	31280	61313	3511	21444	331	64763	47592	23	121	76	203	7166	117
Metabolism;Metabolism of Other Amino Acids;Phosphonate and phosphinate metabolism	21010	5023	16082	7920	168	10625	435	17068	32820	21034	60959	11781	13011	5286	26060	31139	15102	55068	69075	25253	27436	10150	111397	12664	5625	18798	5152	7137	88301	10410	120533	2169	8255	90839	14015	85881	39275	25466	3070	14120	265	47466	40284	19	136	94	162	4437	145
Human Diseases;Immune System Diseases;Primary immunodeficiency	26474	3818	24837	29336	124	18336	949	17336	22476	26343	56207	13708	12630	5326	14186	24010	20592	39000	35637	27962	43386	18957	100981	14007	1722	11683	4893	5754	62045	17027	118229	19483	11180	65003	17875	61452	37603	61119	3314	21388	324	74221	34396	18	114	72	167	7235	111
Human Diseases;Infectious Diseases;Staphylococcus aureus infection	20573	854	65152	1318	21	800	97	2963	29435	7730	12982	14082	12477	3557	2536	32068	2041	91647	4320	27251	17821	3556	179398	11592	1498	2313	6739	4401	141501	2437	152097	2013	1490	149365	3058	139241	3191	35081	486	9913	198	21426	5465	2	171	27	42	1103	29
Unclassified;Cellular Processes and Signaling;Electron transfer carriers	11615	2542	3662	49720	100	9103	527	24530	34695	15380	29423	18507	12386	3432	19533	13088	10820	40649	55641	42163	117246	27886	73628	10969	1375	14882	5652	5504	64463	8953	163304	1619	2879	64276	18930	71436	81214	24730	3243	10620	306	27763	7975	19	110	52	160	19079	83
Metabolism;Biosynthesis of Other Secondary Metabolites;Phenylpropanoid biosynthesis	42730	8927	45191	9187	308	3373	588	10692	30047	34706	100338	10716	13788	5955	40201	43570	9245	18887	106133	25485	29050	19126	89701	14583	4469	30188	4944	12310	42762	6228	77144	34956	18722	31641	16468	30214	16956	92767	3790	12247	186	14550	45140	44	103	149	306	5116	325
Metabolism;Glycan Biosynthesis and Metabolism;Other glycan degradation	33224	6847	58601	8466	187	2347	385	13178	24646	39739	67272	9412	11583	7118	17532	46539	6163	36871	45499	31434	28020	13004	99343	13249	3558	14085	5045	7637	81775	3282	121144	18597	15377	61270	14264	58052	33118	66294	2462	13439	193	23288	44985	25	109	154	154	4153	365
Metabolism;Metabolism of Terpenoids and Polyketides;Biosynthesis of siderophore group nonribosomal peptides	22979	4931	24251	10113	197	10352	429	16240	48403	16552	51323	11855	10513	4950	68838	31079	15637	18830	189717	18964	83440	24082	41576	13873	5036	47839	5559	18542	29151	11022	94451	2518	8127	32201	19132	36601	22835	11446	5704	15079	255	35782	40996	17	59	73	178	15863	113
Metabolism;Xenobiotics Biodegradation and Metabolism;Bisphenol degradation	54285	11713	44001	14423	360	13619	793	18889	13173	35314	117085	9329	21657	6770	16514	67965	21752	19150	34274	22486	24099	21329	69497	26065	4563	16094	5641	6652	34628	16699	60854	19844	19647	33758	22923	30170	19698	52782	4054	20867	248	54185	70336	48	85	136	348	7313	253
Metabolism;Xenobiotics Biodegradation and Metabolism;Styrene degradation	38774	11171	30275	12022	334	5240	296	15309	34204	20964	114786	5433	13381	4850	57660	57348	14379	18866	149109	15466	20144	14704	43644	18630	5273	39513	5511	15049	29040	8043	44740	2288	11500	31311	19631	30069	11629	11209	4831	11066	163	20352	51655	35	85	148	271	5672	306
Metabolism;Lipid Metabolism;Arachidonic acid metabolism	34753	8281	10661	10454	260	11336	663	18062	22965	28063	87845	9041	13227	4840	32674	34279	16988	18891	82695	15131	39923	18710	66297	12478	3162	23596	4932	7970	29053	11945	72725	17989	16492	31848	18192	31733	29000	50005	3900	13510	234	38402	61106	28	84	116	226	6858	233
Human Diseases;Infectious Diseases;Epithelial cell signaling in Helicobacter pylori infection	22784	3572	15133	27283	113	1587	382	11640	23084	23677	51693	13389	11303	3112	15895	23160	5234	38741	40974	33235	43851	13838	97676	7426	4651	11952	3978	3997	64965	2948	118851	18354	8698	61463	12080	61629	37342	60856	2027	5485	172	5379	12937	19	113	78	108	6172	90
Organismal Systems;Endocrine System;Insulin signaling pathway	24158	5978	15934	29955	197	18559	792	17733	22076	20416	60153	8902	11941	5637	23532	27078	21720	20893	61317	19996	36154	15598	41840	13325	4184	17862	4559	7627	39405	17434	72473	2052	7169	35369	19333	33712	29715	18610	3951	21709	305	64908	35188	24	83	92	174	7439	166
Environmental Information Processing;Signaling Molecules and Interaction;Cellular antigens	27567	7937	9277	8366	244	3505	228	15825	24383	18602	73738	8981	11110	3844	22146	29061	8066	36792	54273	19745	38843	12494	74887	11254	2701	15571	5269	5057	57110	4611	86423	2280	11077	59564	13331	59375	22234	17333	2598	5551	150	12270	54823	29	104	102	205	6257	249
Metabolism;Metabolism of Cofactors and Vitamins;Retinol metabolism	36652	8415	19547	34940	274	3539	291	14451	22402	22389	77894	7883	16531	4299	28101	40452	9660	20814	68798	16541	35956	14814	40691	13836	3327	20245	4900	7391	33834	5828	56869	1928	13345	32461	21891	33440	12627	16791	3747	7549	132	23804	59267	28	76	121	243	7372	232
Human Diseases;Cancers;Pathways in cancer	25805	5678	8594	54221	219	11098	627	18153	18344	22515	63636	10804	17777	4406	15362	28979	15331	22981	38360	27163	35975	14328	41317	13453	3739	13120	3950	4818	36028	11351	72045	3368	10345	35577	23651	35491	40896	17550	3598	13057	252	30102	40837	32	102	93	262	6583	185
Human Diseases;Metabolic Diseases;Type II diabetes mellitus	21508	3507	14973	3560	118	17833	866	14819	16812	15994	46690	10128	7087	4720	13543	18702	19829	18841	35172	23195	39598	17933	64976	11107	3136	11583	3693	4884	34452	16563	72228	19078	7916	33472	10682	31620	29639	51928	2514	20238	282	63636	23523	17	70	66	160	6823	99
Organismal Systems;Endocrine System;Adipocytokine signaling pathway	38603	8723	10954	8107	272	28387	1290	26839	9589	16224	89142	6382	11111	5638	12013	34997	32826	1046	27049	15163	35819	24867	33566	19993	4580	12246	4402	4902	745	27004	27839	19624	13247	6010	17548	4057	22229	45329	3840	29467	351	82527	52171	41	57	94	309	8378	239
Human Diseases;Metabolic Diseases;Type I diabetes mellitus	23775	4677	16612	27865	164	18387	801	16686	14778	17511	46188	8829	11273	4602	8553	22752	20350	20989	20480	25519	35664	15472	41177	13884	3882	8738	4174	4210	33914	17416	71497	3157	5591	35441	16278	33478	29849	16992	2901	20584	310	64480	28648	26	87	63	206	7045	116
Metabolism;Metabolism of Terpenoids and Polyketides;Zeatin biosynthesis	20831	3148	13583	27322	112	9644	659	11623	11681	15874	40347	9255	10960	3275	7771	18202	11487	20701	18723	19945	24002	12475	63119	8877	2820	7210	2887	3185	33617	9428	59851	18592	9496	33633	13270	31728	19856	52093	2118	12042	189	37727	22475	17	74	49	145	3679	90
Metabolism;Metabolism of Terpenoids and Polyketides;Biosynthesis of vancomycin group antibiotics	21093	5217	15394	50771	209	9910	579	11588	11824	17456	48160	7700	13448	3553	8656	21986	12518	22629	20055	21288	20215	9450	39592	9397	3215	7645	3508	3087	35798	9984	59221	1783	6825	35436	18437	33570	19810	17437	2751	12882	220	45133	27660	27	87	76	205	3840	156
Metabolism;Xenobiotics Biodegradation and Metabolism;Chlorocyclohexane and chlorobenzene degradation	40909	10848	13527	36007	297	4977	294	12893	14977	23604	98681	3310	16089	3664	31251	51274	12403	2524	78600	8355	16596	13520	6235	16881	4195	22609	4045	8535	2553	7734	14898	2798	14609	3082	22187	4096	1856	5770	3945	8736	99	22511	67643	23	45	124	228	5421	271
Human Diseases;Neurodegenerative Diseases;Amyotrophic lateral sclerosis (ALS)	26293	3650	16471	53354	142	9929	681	13428	10734	13034	41924	11789	17436	3629	14466	26802	13961	4555	37551	22202	36386	16633	29351	9202	1210	11827	2531	4535	7591	10545	27351	18634	13914	6190	22227	7417	23993	49606	3329	12908	166	31601	37687	14	43	62	156	6555	138
Genetic Information Processing;Folding, Sorting and Degradation;Proteasome	16466	3206	6169	27406	107	18015	774	11382	11449	15153	37431	6942	10062	4274	7913	15794	19484	20845	19284	13912	19850	11367	40476	12292	1321	7790	3117	3537	33620	16717	58854	2641	5091	35054	14743	31734	19270	14799	2728	18400	261	53890	27068	21	77	60	165	4373	80
Genetic Information Processing;Folding, Sorting and Degradation;Protein processing in endoplasmic reticulum	23465	7239	6821	52031	212	3175	351	9774	11647	19796	68717	8406	15114	3206	10272	22491	5326	22638	21774	16039	20178	8895	38466	9733	1768	8006	3772	2669	38544	4076	59481	2656	7793	33757	19182	33686	20305	17725	2579	4684	126	3522	26820	31	90	94	168	3615	198
Organismal Systems;Excretory System;Proximal tubule bicarbonate reclamation	16522	3929	4722	5367	102	17661	652	11020	13898	16141	40024	5856	7781	3794	12539	13412	19554	18729	32998	11296	19782	10778	40467	10392	1073	10360	3158	4296	28803	16190	58767	1650	5167	33067	10637	29889	18137	10666	2535	17913	245	53546	30293	13	61	55	112	4226	89
Metabolism;Xenobiotics Biodegradation and Metabolism;Atrazine degradation	24043	6408	9325	30759	154	2959	243	7919	14800	12041	67318	5161	12715	2861	22870	31626	9041	20663	58156	9863	4618	5901	39694	8540	7941	16815	3255	4955	30830	5259	32668	1541	8380	32060	15704	30266	2077	11695	2710	5912	123	4994	29433	26	85	79	186	1577	147
Environmental Information Processing;Signal Transduction;MAPK signaling pathway - yeast	18869	3587	21939	3701	119	1468	277	7103	12365	15769	45953	7674	7044	2275	9127	22493	3306	18441	22552	18438	23852	10246	61809	5736	1450	7205	2740	2896	31535	2120	60119	17253	8562	30397	7080	29986	18901	48895	1183	5525	109	13348	19053	15	63	62	117	3397	109
Metabolism;Lipid Metabolism;Linoleic acid metabolism	31713	5605	35350	10128	172	10465	612	10722	5550	25167	61143	3981	13830	4350	9686	33409	13839	686	21428	13866	4702	11995	29661	12197	2055	8976	2476	4470	6033	11279	17497	18093	16017	3402	14676	484	8408	44641	2513	15747	172	34807	56808	27	38	82	201	2290	127
Metabolism;Lipid Metabolism;alpha-Linolenic acid metabolism	17608	3755	5144	29412	113	9754	441	15183	16034	11888	36948	7213	9407	2890	18561	17246	11905	2446	48536	17845	47562	15455	3832	8811	1282	13508	2826	5259	2748	9767	38106	2027	7149	3872	15993	7138	32438	7974	2917	10837	166	28148	34332	17	28	54	118	9150	99
Environmental Information Processing;Signaling Molecules and Interaction;Ion channels	15563	2064	29170	3907	77	8930	504	11447	14926	14538	30445	5651	5539	2482	20257	20828	10963	482	54591	8417	20522	12115	28059	7052	2987	14934	2005	7375	421	8713	29351	17152	7665	2821	9158	1936	18499	42000	2324	13498	145	42300	16079	6	20	35	82	4109	69
Metabolism;Biosynthesis of Other Secondary Metabolites;Butirosin and neomycin biosynthesis	18064	4407	14416	3523	147	9787	417	7329	9561	16145	42721	3526	7175	3604	8073	19562	12300	18682	19326	15173	4092	6142	39516	9290	1824	7433	3001	3043	34193	10097	46557	1787	4492	31915	7545	28263	7944	10934	1607	12324	178	38061	25869	21	69	70	154	1365	121
Metabolism;Lipid Metabolism;Sphingolipid metabolism	27399	11300	32695	6142	316	3089	180	7772	8316	36752	66999	1106	8165	5453	14570	42083	6381	654	35741	14017	999	5642	4261	10814	3427	11690	3146	5057	25257	3206	47024	1427	6866	1850	9443	715	21340	12881	1959	9478	119	17129	29364	47	45	167	146	1297	335
Cellular Processes;Transport and Catabolism;Lysosome	15490	7646	11816	4757	198	1584	97	8803	13396	18659	33933	3450	5609	2779	10218	26154	3633	18546	26321	13405	19485	5796	37580	8186	703	8441	2904	3389	34020	1591	58303	829	6093	30060	7341	29764	17611	12559	1481	3922	101	12050	27423	38	49	80	94	3112	188
Metabolism;Biosynthesis of Other Secondary Metabolites;beta-Lactam resistance	14733	3421	13468	5158	126	1337	89	7718	11978	10680	32497	5357	7261	2377	8305	17704	3994	18394	20980	10373	19515	6429	37489	6013	1481	6353	2699	2396	31338	2286	43446	786	6808	30019	7310	29717	11258	9494	1289	4028	91	11989	32239	12	51	54	105	3295	132
Metabolism;Metabolism of Terpenoids and Polyketides;Carotenoid biosynthesis	24251	5498	7718	3183	225	10361	642	5564	10749	9158	53388	2799	5606	3273	19568	21498	14186	562	48812	3313	4939	10078	29800	8659	3740	17351	2290	5962	3074	11717	2189	17540	7618	2435	9997	312	1208	41743	2419	12061	226	30341	15743	31	65	78	289	1492	176
Organismal Systems;Immune System;NOD-like receptor signaling pathway	9686	2113	2725	26557	71	1155	170	7923	11412	13788	24714	6621	8641	1874	7135	9862	2302	20430	17679	12379	19861	5229	36747	4987	887	5472	2018	2006	33569	1611	58740	1435	4364	31567	9905	31684	19012	13336	1394	2066	95	1550	15442	13	65	41	75	3010	61
Human Diseases;Cancers;Prostate cancer	9200	2104	2695	26498	71	1149	164	6019	11048	13646	24563	6621	8588	1863	7086	9794	2254	20410	17592	12352	19813	5220	36724	4985	885	5440	2007	1981	33533	1596	58736	1429	4272	31566	9892	31684	18999	12424	1379	2058	95	1345	15197	13	65	41	75	3006	61
Organismal Systems;Endocrine System;Progesterone-mediated oocyte maturation	9200	2104	2695	26498	71	1149	164	6018	11048	13646	24563	6621	8588	1863	7086	9794	2254	20410	17592	12352	19813	5220	36724	4985	885	5440	2007	1981	33533	1596	58736	1429	4272	31566	9892	31684	18999	12423	1379	2058	95	1345	15197	13	65	41	75	3006	61
Organismal Systems;Immune System;Antigen processing and presentation	9200	2104	2695	26498	71	1149	164	6018	11048	13646	24563	6621	8588	1863	7086	9794	2254	20410	17592	12352	19813	5220	36724	4985	885	5440	2007	1981	33533	1596	58736	1429	4272	31566	9892	31684	18999	12423	1379	2058	95	1345	15197	13	65	41	75	3006	61
Metabolism;Biosynthesis of Other Secondary Metabolites;Penicillin and cephalosporin biosynthesis	22180	6410	24182	6950	205	2370	124	12510	11526	15484	54725	3373	8411	2787	14963	29217	6119	375	37498	13957	16143	8865	3543	8033	2362	10915	2927	4242	3260	3614	13452	841	9010	1139	10591	2003	21042	4313	2017	7292	86	22224	42997	22	32	88	168	3736	199
Metabolism;Xenobiotics Biodegradation and Metabolism;Fluorobenzoate degradation	22938	6332	8701	7320	193	2753	144	7643	11819	12654	61859	1347	6328	2058	25600	30567	8910	313	66445	3775	16063	9585	4626	10996	3159	18292	2280	6447	297	4613	13308	1328	6823	690	9796	1887	483	1452	2341	5024	65	4882	31613	15	21	61	129	4275	178
Human Diseases;Neurodegenerative Diseases;Parkinson's disease	22363	5818	6117	75157	203	2112	327	4671	1758	10406	58221	3803	16525	1952	5725	27218	6925	6628	11120	11219	1081	5296	3860	8426	1233	4651	1850	1460	6720	2530	1885	719	9396	5923	22687	5967	2760	13530	2551	4308	56	2586	31760	18	50	73	193	555	168
Unclassified;Genetic Information Processing;Transcription related proteins	3013	1010	9261	1519	37	467	37	4028	17157	2545	10936	5024	2008	1596	16530	7800	1374	18281	44950	8541	20307	4454	36349	2948	823	11061	1776	4621	31270	566	43507	558	943	29774	3448	29635	11199	9154	1164	2139	69	3240	2678	6	39	27	31	3168	23
Human Diseases;Cancers;Renal cell carcinoma	12669	2691	3931	27114	90	9518	438	11158	7122	7445	28600	4165	7948	2303	7862	13812	11184	2455	19923	13399	16112	8029	3471	6503	2634	6847	1661	2496	2441	9047	13232	1757	5168	3831	12530	3772	21801	4969	2052	10310	145	27866	22771	16	29	35	123	3494	72
Organismal Systems;Circulatory System;Cardiac muscle contraction	18373	4891	4161	74548	145	1666	301	3709	1594	9017	47879	3786	15317	1723	5316	21879	5030	6511	10319	9815	1036	4226	2732	6417	1013	3839	1571	1125	6665	1793	1808	544	8492	5745	21459	5932	2661	13360	2385	3587	45	1709	28834	15	42	59	129	475	118
Genetic Information Processing;Folding, Sorting and Degradation;Ubiquitin system	13762	2602	4018	2870	88	17216	637	10837	5667	5849	26929	2725	3839	2868	7815	10774	18304	588	19384	6649	15886	9856	4386	8293	1016	7002	2143	2874	376	15880	12685	1313	2553	3527	7858	1785	10819	3660	1962	17500	209	53765	18811	13	22	23	112	3913	71
Metabolism;Glycan Biosynthesis and Metabolism;Glycosphingolipid biosynthesis - globo series	12465	3454	28449	3504	90	1171	83	6975	9029	15734	30249	1217	3664	2488	10808	19451	2676	306	28683	8401	15929	6324	2105	5452	639	7890	1951	4349	8582	1333	28221	470	4495	1247	5971	1972	17436	6678	1254	6286	64	15655	20888	11	17	61	83	3314	149
Human Diseases;Cancers;Bladder cancer	8418	574	1711	1198	27	8224	464	5595	5053	3237	12672	4512	1937	1406	5110	3258	8859	226	14662	5284	19993	10035	26200	3632	316	4867	911	1989	255	7545	13492	16727	5709	1706	3833	1738	11187	40355	1013	8235	104	26199	11591	5	9	10	58	3210	22
Human Diseases;Infectious Diseases;African trypanosomiasis	9504	1883	2927	3048	55	9290	344	8529	5300	5478	22308	2878	3614	1926	7254	9408	10745	372	19451	7006	15841	7377	3029	5835	637	5733	1384	2366	297	8350	12581	1583	3612	1942	6723	1765	10987	2469	1369	9348	111	27126	19768	5	15	27	78	3301	50
Genetic Information Processing;Replication and Repair;Non-homologous end-joining	19885	5260	6684	27102	173	2818	216	4732	1157	8310	44602	2879	8915	1641	4265	22871	5619	2219	9041	4845	421	5014	2821	8130	1754	3661	1806	1163	2368	3710	782	2400	5922	2575	11542	2017	1695	5285	1501	3541	46	2801	22427	16	30	82	110	1073	162
Metabolism;Glycan Biosynthesis and Metabolism;Glycosaminoglycan degradation	9385	4185	10418	3052	114	797	65	6491	7572	14392	21985	764	2547	1096	9608	16203	1843	255	25050	8384	15779	4907	1305	3981	459	7095	1409	3067	213	757	27883	372	3686	521	4745	1883	17048	2533	1084	2644	55	11303	15756	17	11	45	59	2932	124
Human Diseases;Infectious Diseases;Chagas disease (American trypanosomiasis)	8406	1641	2020	2625	62	8843	325	8320	5269	5699	19467	2142	2674	1804	6572	7058	10204	355	17752	6735	15842	7213	2723	5315	488	5314	1291	2276	291	7805	12556	747	3649	1812	5490	1762	10649	2372	1240	8862	110	26739	22828	5	13	24	89	3238	56
Metabolism;Glycan Biosynthesis and Metabolism;N-Glycan biosynthesis	13073	4395	4727	25612	147	9556	460	5368	671	5999	27874	1496	6177	2191	2018	11728	10551	2341	3788	3925	433	4743	2989	6721	990	3175	1526	1036	5024	9074	412	826	3598	3782	10480	1926	1188	6079	1611	9818	135	27294	16823	19	33	42	143	882	99
Cellular Processes;Cell Growth and Death;Meiosis - yeast	15037	4088	4826	2397	154	10094	374	4518	722	8327	40180	246	3348	1683	1961	15346	11735	318	4172	2572	154	5282	3811	7647	1101	2837	1352	1268	198	9397	597	967	3744	2074	5623	172	314	1921	1237	10036	106	27752	24793	16	18	56	72	1191	120
Metabolism;Lipid Metabolism;Primary bile acid biosynthesis	7594	1903	19504	2378	62	775	40	5308	3012	12427	19231	1972	2637	1161	1781	14962	1718	211	3436	6192	15585	5632	1604	3919	662	1885	1169	1471	2984	1020	27788	337	2800	859	3683	1855	17444	2435	521	3535	55	5351	11608	9	13	27	63	3208	40
Organismal Systems;Digestive System;Carbohydrate digestion and absorption	4164	387	1558	1002	19	8404	308	6318	4600	1475	7447	1646	2128	1682	5792	2285	8743	269	16828	2261	15943	5820	1945	3307	420	4777	988	2124	2907	7551	12639	594	714	1711	4065	1717	416	4125	1092	8427	99	41151	6657	4	5	14	52	3191	15
Human Diseases;Neurodegenerative Diseases;Prion diseases	4671	781	1439	25160	26	542	92	4362	4855	3722	5619	4271	5709	681	5427	5737	1248	2060	14961	6780	16073	4137	830	1472	267	4050	707	1401	2361	947	13075	997	3075	2008	7669	3667	11640	4345	1024	1014	35	859	10913	4	14	11	29	2857	24
Metabolism;Glycan Biosynthesis and Metabolism;Glycosphingolipid biosynthesis - ganglio series	5839	1343	9638	2346	43	470	41	5331	7368	4650	12374	716	1591	779	9095	8980	1227	125	24240	6065	15595	4333	844	2279	362	6272	993	2960	153	439	12449	271	2873	396	3944	1727	10268	2217	892	2228	30	3112	12097	4	4	22	37	2818	91
Metabolism;Lipid Metabolism;Ether lipid metabolism	11539	1684	4963	1965	40	9060	327	3083	262	4003	14379	601	2076	1683	2072	7609	9730	245	4722	13057	106	3789	2576	4744	556	2317	894	954	79	8184	490	2402	2618	1843	4385	145	480	1424	973	9413	89	26373	16413	5	9	23	43	779	53
Organismal Systems;Digestive System;Mineral absorption	8656	1578	3169	2619	37	8655	327	3774	265	5134	20882	499	3454	1688	1557	8055	9702	289	3559	1992	112	3634	2610	4297	900	2114	939	817	109	8333	535	705	3340	1781	5622	158	218	1468	1007	9242	103	26837	19531	5	12	22	57	714	36
Metabolism;Lipid Metabolism;Secondary bile acid biosynthesis	3025	612	17654	1140	22	153	10	3849	2683	10095	6981	1922	1323	769	427	9251	322	152	642	5352	15543	4196	850	1741	231	601	793	1094	2943	267	27727	74	1266	694	2138	1835	17358	2175	248	2894	45	4612	5192	4	9	14	20	2819	14
Metabolism;Biosynthesis of Other Secondary Metabolites;Stilbenoid, diarylheptanoid and gingerol biosynthesis	16148	3962	6190	1277	148	2057	127	2415	1214	5997	30336	552	3243	953	2396	15699	4130	184	3867	9577	212	3996	2257	8522	1602	4065	1251	1350	153	3524	222	1382	1072	645	3009	60	336	833	750	2342	32	2520	4890	20	16	35	115	1693	89
Metabolism;Lipid Metabolism;Steroid hormone biosynthesis	9537	4732	2367	2887	140	1208	56	2864	3232	5951	23865	911	3929	956	6745	16275	2642	204	16792	2652	252	2115	1510	4264	1303	5651	1085	1691	153	1724	248	501	2799	359	4032	66	274	1560	891	1921	35	1417	11354	19	13	46	55	673	120
Metabolism;Lipid Metabolism;Steroid biosynthesis	7984	3057	3253	863	85	9056	325	2515	381	2579	14455	910	2226	1401	739	6512	9351	289	1383	1566	53	3908	2292	5164	326	1788	1081	979	78	8165	137	1493	918	1902	3406	35	514	1440	859	8599	96	26605	7828	12	11	30	48	804	49
Organismal Systems;Digestive System;Bile secretion	3679	353	1810	646	14	8555	304	1830	2596	777	5134	599	577	1257	4606	1973	8098	213	12146	639	102	2561	1795	3049	141	3602	455	1860	83	7276	63	1270	388	1749	2766	22	446	2024	850	8073	84	26059	5403	1	7	4	23	581	13
Genetic Information Processing;Transcription;Basal transcription factors	3024	300	1667	476	8	8352	297	2273	130	609	4729	157	629	1151	152	2110	8477	191	654	1084	96	2708	1839	3313	220	952	460	679	54	7498	46	529	341	1710	2256	25	120	1130	607	8155	84	26190	5571	1	3	2	26	575	3
Metabolism;Biosynthesis of Other Secondary Metabolites;Flavonoid biosynthesis	9893	3004	3403	905	101	1084	52	1648	687	3382	23294	386	2186	395	2409	7044	1999	117	4239	7197	146	1668	1075	2705	921	1794	836	344	93	1518	96	727	1036	203	2160	29	130	531	428	1375	11	1057	3951	9	9	24	40	340	92
Human Diseases;Infectious Diseases;Bacterial invasion of epithelial cells	588	115	284	415	7	46	1	3042	4519	1260	1720	1827	151	137	4310	532	149	15	11803	4373	15833	3419	88	518	112	2804	440	1176	154	82	12553	57	216	12	1387	1719	10367	65	356	138	18	412	553	1	0	3	9	2661	7
Metabolism;Metabolism of Other Amino Acids;D-Arginine and D-ornithine metabolism	4201	1131	1379	587	38	428	23	927	3830	2146	10830	384	1527	285	4835	5657	1111	87	12088	4829	144	1028	673	1289	644	3349	497	1391	54	823	490	165	401	115	1197	168	175	356	359	1132	10	1181	1482	4	8	11	28	280	26
Cellular Processes;Cell Growth and Death;Apoptosis	5082	967	2362	1610	59	501	28	1659	303	2600	11749	19	2117	339	492	6421	2089	118	978	1580	47	1235	1214	1998	329	922	319	364	58	780	79	205	1964	189	2346	37	99	205	284	867	12	8537	7516	3	8	15	72	87	50
Human Diseases;Infectious Diseases;Amoebiasis	7560	1622	2503	991	45	591	22	1376	164	3235	12492	377	2020	344	845	3451	1128	98	1179	7107	89	1305	688	1560	241	699	599	174	74	1027	465	634	1623	129	1495	134	92	387	284	1019	9	989	8980	3	4	19	20	225	38
Unclassified;Cellular Processes and Signaling;Germination	5720	507	2101	507	0	265	18	350	259	1842	5672	5115	11424	976	297	4559	768	125	82	7794	69	790	252	2375	417	119	249	245	2885	2541	242	673	93	129	1180	86	467	1189	175	859	16	620	552	0	0	6	0	341	1
Metabolism;Energy Metabolism;Photosynthesis - antenna proteins	4196	730	2669	578	98	764	127	1585	503	3303	10176	28	1474	946	645	931	802	109	1448	397	377	1540	979	475	7178	6602	700	172	201	3932	497	470	547	469	3253	115	282	516	312	1115	200	268	696	41	70	20	252	216	42
Metabolism;Xenobiotics Biodegradation and Metabolism;1,1,1-Trichloro-2,2-bis(4-chlorophenyl)ethane (DDT) degradation	1590	227	383	23721	4	146	71	201	190	241	2859	1238	3484	109	56	721	144	1999	227	1802	194	176	84	436	55	166	126	58	2135	146	124	52	1060	1829	5518	1834	795	3282	564	401	4	111	182	1	6	4	3	82	12
Cellular Processes;Cell Growth and Death;p53 signaling pathway	4282	983	2094	782	59	450	28	1044	175	1624	12658	322	1870	276	472	6005	1980	127	882	1498	54	1138	1142	2068	233	937	298	341	65	838	94	191	1117	187	1670	40	127	167	208	876	13	913	3384	4	9	14	71	92	62
Organismal Systems;Digestive System;Protein digestion and absorption	3989	1073	869	1632	41	421	53	2662	153	3181	9111	28	1472	387	630	3201	912	56	937	618	50	789	471	1152	189	816	337	137	48	400	57	132	2468	95	2013	20	67	249	252	595	8	336	11571	8	7	14	47	104	45
Metabolism;Glycan Biosynthesis and Metabolism;Various types of N-glycan biosynthesis	750	4	26	23583	0	0	69	110	2	40	8	1228	3342	78	8	30	52	1988	44	1669	190	6	60	4	5	16	34	2	2126	8	118	4	966	1798	5050	1832	784	3224	491	154	4	26	40	0	7	0	3	1	0
Human Diseases;Infectious Diseases;Influenza A	3962	830	1950	609	56	446	25	967	158	1370	10285	19	1211	233	404	5334	1891	117	816	1388	45	1060	1121	1930	220	807	265	338	53	699	75	175	903	180	1231	34	97	157	161	661	11	879	2872	3	8	14	64	85	50
Human Diseases;Cardiovascular Diseases;Viral myocarditis	3934	830	1941	609	56	410	25	961	157	1363	10285	17	1208	228	404	5334	1891	117	816	1386	45	1060	1121	1927	220	807	265	335	53	690	75	173	902	178	1227	34	95	157	159	659	11	876	2872	3	8	14	64	80	50
Human Diseases;Cancers;Small cell lung cancer	3870	830	1946	609	56	411	25	960	157	1359	10285	17	1191	229	404	5334	1891	115	834	1374	45	1057	1121	1920	220	808	259	335	53	690	75	174	902	176	1227	34	95	147	159	661	11	876	2868	3	8	14	64	80	50
Human Diseases;Infectious Diseases;Toxoplasmosis	3868	830	1940	609	56	409	25	960	157	1358	10285	17	1187	228	420	5334	1891	115	816	1378	45	1053	1121	1909	220	807	259	335	53	690	75	173	902	176	1226	34	95	147	159	659	11	876	2867	3	8	14	64	79	50
Human Diseases;Cancers;Colorectal cancer	3868	830	1940	609	56	409	25	960	157	1358	10285	17	1187	228	404	5334	1891	115	816	1374	45	1053	1121	1909	220	807	259	335	53	690	75	173	902	176	1226	34	95	147	159	659	11	876	2867	3	8	14	64	79	50
Organismal Systems;Immune System;RIG-I-like receptor signaling pathway	1020	270	738	516	8	174	5	828	3024	672	2728	101	528	182	4453	1275	288	17	12274	508	123	261	216	507	290	2936	72	1327	15	369	90	137	437	68	742	14	106	119	308	299	4	799	1826	0	0	2	4	188	4
Organismal Systems;Endocrine System;Renin-angiotensin system	2552	485	590	1219	13	239	8	838	33	2425	3293	327	1720	240	226	1391	661	21	856	523	15	428	271	709	150	228	241	38	21	340	18	62	1741	52	1371	9	43	123	175	387	3	165	9938	0	2	9	16	63	18
Organismal Systems;Environmental Adaptation;Circadian rhythm - plant	3023	1006	1029	280	35	369	17	785	105	1086	6233	347	1134	152	917	2835	661	30	1715	519	16	596	372	1058	452	672	334	124	39	671	34	85	269	74	716	11	55	171	149	475	4	422	1046	2	4	8	15	134	40
Metabolism;Biosynthesis of Other Secondary Metabolites;Flavone and flavonol biosynthesis	1702	309	282	39	8	87	4	165	83	654	3363	17	312	61	129	884	249	46	200	1209	152	236	148	321	52	147	219	27	26	185	134	29	55	29	254	25	13	110	58	209	1	8007	479	0	0	4	9	56	15
Human Diseases;Infectious Diseases;Shigellosis	80	0	3	8	0	1	0	2819	1518	544	13	2	35	9	37	5	2	2	132	4270	57	65	0	23	2	36	6	9	0	0	44	6	0	3	22	40	9938	11	9	1	5	4	13	1	0	0	1	15	1
Metabolism;Metabolism of Terpenoids and Polyketides;Biosynthesis of type II polyketide products	1113	328	234	148	2	166	5	212	200	222	3017	7	154	95	1887	1382	399	11	4431	154	6	407	201	877	205	1108	68	145	8	244	14	96	100	20	402	5	11	76	73	248	0	287	432	0	1	0	1	114	2
Human Diseases;Cardiovascular Diseases;Hypertrophic cardiomyopathy (HCM)	1074	202	110	499	11	93	2	392	13	1458	1756	5	509	143	184	373	287	12	547	200	9	212	111	238	45	131	105	12	10	41	3	20	1048	23	429	4	9	51	64	109	1	37	6857	0	1	5	14	6	13
Metabolism;Biosynthesis of Other Secondary Metabolites;Betalain biosynthesis	1178	390	388	131	8	227	14	354	52	458	4667	14	293	67	215	1691	663	23	608	201	16	494	368	467	141	252	137	72	19	335	23	53	114	39	443	9	23	120	57	356	1	242	482	2	1	2	6	56	7
Human Diseases;Immune System Diseases;Systemic lupus erythematosus	474	462	190	154	9	145	3	153	41	265	2959	2	175	109	786	1596	358	19	1742	160	3	213	206	198	123	441	58	29	7	96	6	49	191	18	585	3	6	76	107	244	2	107	361	0	0	6	2	21	5
Metabolism;Biosynthesis of Other Secondary Metabolites;Caffeine metabolism	779	146	747	137	3	144	9	443	81	135	2912	26	176	43	91	1710	615	17	93	168	8	386	278	510	107	221	74	121	10	457	23	94	104	61	260	5	24	46	42	249	2	437	678	1	2	0	11	123	11
Human Diseases;Infectious Diseases;Vibrio cholerae infection	1247	142	65	121	3	46	2	178	719	296	756	3	139	24	645	76	152	53	1529	81	117	103	38	68	17	403	35	127	79	57	32	15	177	7	128	3	34	1891	55	29	1	59	881	1	0	0	3	14	1
Metabolism;Biosynthesis of Other Secondary Metabolites;Indole alkaloid biosynthesis	913	250	308	40	8	150	9	175	36	337	2048	10	203	24	91	312	294	13	253	131	15	338	167	361	51	166	98	48	15	177	19	23	59	32	181	7	16	86	25	148	1	104	276	2	1	2	5	29	5
Organismal Systems;Endocrine System;Melanogenesis	233	144	67	91	0	71	4	180	16	96	2619	4	84	37	124	1293	354	9	341	53	1	160	185	99	89	69	39	16	4	159	3	32	58	7	263	2	6	34	32	206	0	136	223	0	0	0	1	14	2
Metabolism;Biosynthesis of Other Secondary Metabolites;Isoflavonoid biosynthesis	455	47	356	156	4	16	0	102	20	315	919	308	711	27	4	278	97	3	310	84	3	59	14	147	14	12	27	9	8	123	11	12	206	2	160	2	26	17	18	73	1	63	1156	0	0	1	0	13	1
Metabolism;Glycan Biosynthesis and Metabolism;Glycosylphosphatidylinositol(GPI)-anchor biosynthesis	278	208	0	0	0	32	2	0	4	67	2285	0	16	10	28	2	0	2	0	50	0	82	18	63	0	0	48	8	0	4	0	0	0	0	36	0	2	12	0	2	0	12	0	0	0	0	0	0	0
Metabolism;Metabolism of Terpenoids and Polyketides;Biosynthesis of 12-, 14- and 16-membered macrolides	371	20	583	33	0	5	1	31	55	207	242	2	38	12	2	170	69	1	19	52	0	166	1	240	45	40	22	54	3	125	4	37	11	12	268	0	2	4	51	50	0	94	26	0	0	3	0	56	0
Organismal Systems;Immune System;Fc gamma R-mediated phagocytosis	147	28	35	31	3	38	2	92	7	108	232	3	68	22	169	744	20	6	104	37	12	34	114	98	6	177	4	13	3	56	7	9	57	6	93	3	12	6	19	65	2	54	220	1	1	0	3	22	1
Environmental Information Processing;Signal Transduction;Calcium signaling pathway	104	60	149	19	2	28	2	68	19	175	133	1	29	42	11	26	10	1	60	22	7	52	22	41	321	235	39	5	9	146	8	23	18	17	183	3	5	10	19	28	6	11	42	1	2	1	5	7	2
Genetic Information Processing;Translation;mRNA surveillance pathway	233	112	32	11	4	20	2	42	10	92	50	3	21	13	196	288	19	9	70	53	2	90	21	169	18	92	77	18	2	57	8	4	12	9	0	0	6	43	4	74	0	10	16	0	0	1	1	27	1
Organismal Systems;Endocrine System;GnRH signaling pathway	116	27	33	26	1	36	2	54	1	90	220	2	46	10	174	351	20	2	92	25	2	4	34	72	4	67	2	7	1	34	1	7	43	5	47	1	6	6	15	36	0	32	210	1	1	0	1	19	1
Cellular Processes;Transport and Catabolism;Endocytosis	116	27	33	26	1	36	2	54	1	90	220	2	46	10	158	351	20	2	92	25	2	4	34	72	4	67	2	7	1	34	1	7	43	5	47	1	6	6	15	36	0	32	210	1	1	0	1	19	1
Metabolism;Enzyme Families;Cytochrome P450	153	52	43	3	1	9	1	32	2	49	77	5	45	17	9	196	28	3	17	45	1	73	28	79	4	45	10	14	0	58	3	17	17	21	22	0	4	11	9	21	0	24	78	0	0	0	1	43	4
Metabolism;Glycan Biosynthesis and Metabolism;Glycosphingolipid biosynthesis - lacto and neolacto series	47	11	188	71	0	2	0	24	1	80	113	0	48	11	0	12	42	0	23	11	0	13	17	14	11	7	0	3	0	23	1	5	120	3	51	0	1	1	4	19	0	0	293	0	0	0	0	2	0
Metabolism;Metabolism of Terpenoids and Polyketides;Biosynthesis of type II polyketide backbone	183	40	99	45	0	3	0	27	0	120	0	8	37	22	3	20	43	0	28	45	0	215	0	17	0	1	33	15	0	50	1	28	0	5	22	0	4	0	22	32	0	40	8	0	0	3	0	22	0
Organismal Systems;Excretory System;Vasopressin-regulated water reabsorption	142	83	27	0	0	48	0	2	6	48	512	0	11	4	38	22	0	0	93	25	0	36	3	46	0	6	14	9	2	4	0	0	0	2	0	1	0	8	8	2	0	4	33	0	0	0	0	0	0
Metabolism;Lipid Metabolism;Fatty acid elongation in mitochondria	137	77	5	1	1	37	0	2	8	34	324	0	23	1	49	133	20	3	16	43	3	34	4	31	4	40	21	0	2	28	2	2	3	4	31	0	2	21	17	9	0	15	7	0	0	1	1	3	1
Organismal Systems;Digestive System;Fat digestion and absorption	31	1	2	5	2	2	0	38	6	18	12	1	22	12	27	393	0	4	12	12	10	30	80	26	2	110	2	6	2	22	6	2	14	1	46	2	6	0	4	29	2	22	10	0	0	0	2	3	0
Environmental Information Processing;Signaling Molecules and Interaction;G protein-coupled receptors	74	2	29	2	0	0	1	98	0	0	132	2	0	0	0	126	31	0	0	0	0	46	9	1	7	2	2	2	0	86	2	2	5	0	93	0	2	0	3	34	0	50	28	0	0	0	0	6	0
Environmental Information Processing;Signal Transduction;Notch signaling pathway	66	53	22	0	2	20	0	17	17	65	188	1	50	11	10	39	2	1	11	38	5	22	1	45	0	25	23	6	1	18	2	8	3	4	2	1	1	11	8	28	1	15	1	0	0	3	0	3	2
Environmental Information Processing;Signal Transduction;Wnt signaling pathway	66	53	22	0	2	20	0	17	17	65	188	1	50	11	10	39	2	1	11	38	5	22	1	45	0	25	23	6	1	18	2	8	3	4	2	1	1	11	8	28	1	15	1	0	0	3	0	3	2
Human Diseases;Cancers;Chronic myeloid leukemia	66	53	22	0	2	20	0	17	17	65	188	1	50	11	10	39	2	1	11	38	5	22	1	45	0	25	23	6	1	18	2	8	3	4	2	1	1	11	8	28	1	15	1	0	0	3	0	3	2
Metabolism;Biosynthesis of Other Secondary Metabolites;Clavulanic acid biosynthesis	42	14	48	1	0	17	0	25	0	19	41	2	5	3	1	181	2	0	0	28	0	28	6	22	22	2	0	4	0	24	0	3	4	5	19	0	1	8	0	17	0	2	30	0	0	0	1	6	0
Organismal Systems;Immune System;Hematopoietic cell lineage	22	9	25	0	0	6	1	3	2	44	0	4	6	8	0	92	20	0	16	25	0	12	22	57	4	34	0	4	0	35	0	5	5	6	2	0	3	1	0	12	0	4	27	0	0	0	0	20	0
Human Diseases;Infectious Diseases;Pathogenic Escherichia coli infection	66	0	1	0	0	1	0	1	0	5	0	0	21	0	0	0	0	2	0	12	100	32	0	23	0	0	6	0	0	0	90	0	0	2	1	10	0	10	0	0	0	0	5	0	0	0	0	16	0
Metabolism;Metabolism of Terpenoids and Polyketides;Sesquiterpenoid biosynthesis	73	0	31	0	0	1	0	0	2	15	0	4	14	21	0	0	0	0	1	4	0	0	0	6	0	1	0	10	0	35	0	4	2	4	19	0	3	0	11	8	0	12	2	0	0	0	0	14	0
Cellular Processes;Cell Communication;Focal adhesion	69	8	1	0	0	1	0	1	0	22	0	0	21	0	0	0	0	2	18	12	0	11	0	18	0	0	6	0	0	0	0	0	0	2	1	0	0	10	0	0	0	0	5	0	0	0	0	1	0
Organismal Systems;Digestive System;Pancreatic secretion	28	0	11	0	0	24	0	6	1	11	0	2	3	5	22	0	0	0	18	2	0	0	0	3	0	0	0	3	0	9	0	2	1	2	4	0	2	0	2	2	0	3	0	0	0	0	0	5	0
Cellular Processes;Cell Communication;Adherens junction	66	0	1	0	0	1	0	1	0	5	0	0	21	0	0	0	0	2	0	12	0	7	0	18	0	0	6	0	0	0	0	0	0	2	1	0	0	10	0	0	0	0	5	0	0	0	0	1	0
Cellular Processes;Cell Communication;Tight junction	66	0	1	0	0	1	0	1	0	5	0	0	21	0	0	0	0	2	0	12	0	7	0	18	0	0	6	0	0	0	0	0	0	2	1	0	0	10	0	0	0	0	5	0	0	0	0	1	0
Cellular Processes;Cell Motility;Regulation of actin cytoskeleton	66	0	1	0	0	1	0	1	0	5	0	0	21	0	0	0	0	2	0	12	0	7	0	18	0	0	6	0	0	0	0	0	0	2	1	0	0	10	0	0	0	0	5	0	0	0	0	1	0
Cellular Processes;Transport and Catabolism;Phagosome	66	0	1	0	0	1	0	1	0	5	0	0	21	0	0	0	0	2	0	12	0	7	0	18	0	0	6	0	0	0	0	0	0	2	1	0	0	10	0	0	0	0	5	0	0	0	0	1	0
Human Diseases;Cardiovascular Diseases;Arrhythmogenic right ventricular cardiomyopathy (ARVC)	66	0	1	0	0	1	0	1	0	5	0	0	21	0	0	0	0	2	0	12	0	7	0	18	0	0	6	0	0	0	0	0	0	2	1	0	0	10	0	0	0	0	5	0	0	0	0	1	0
Human Diseases;Cardiovascular Diseases;Dilated cardiomyopathy (DCM)	66	0	1	0	0	1	0	1	0	5	0	0	21	0	0	0	0	2	0	12	0	7	0	18	0	0	6	0	0	0	0	0	0	2	1	0	0	10	0	0	0	0	5	0	0	0	0	1	0
Organismal Systems;Immune System;Leukocyte transendothelial migration	66	0	1	0	0	1	0	1	0	5	0	0	21	0	0	0	0	2	0	12	0	7	0	18	0	0	6	0	0	0	0	0	0	2	1	0	0	10	0	0	0	0	5	0	0	0	0	1	0
Organismal Systems;Sensory System;Phototransduction - fly	66	0	1	0	0	1	0	1	0	5	0	0	21	0	0	0	0	2	0	12	0	7	0	18	0	0	6	0	0	0	0	0	0	2	1	0	0	10	0	0	0	0	5	0	0	0	0	1	0
Environmental Information Processing;Signaling Molecules and Interaction;Neuroactive ligand-receptor interaction	28	0	9	0	0	36	0	6	1	7	0	2	3	5	0	0	0	0	0	2	0	0	0	3	0	0	0	3	0	9	0	2	1	2	4	0	2	0	2	2	0	3	0	0	0	0	0	5	0
Environmental Information Processing;Signaling Molecules and Interaction;CAM ligands	3	8	0	0	0	12	0	0	0	17	0	0	0	0	0	0	0	0	18	0	0	4	0	0	0	0	0	0	0	0	0	0	0	0	0	0	0	0	0	0	0	0	0	0	0	0	0	0	0
Environmental Information Processing;Signaling Molecules and Interaction;Glycan bindng proteins	30	0	0	0	0	0	0	0	0	0	0	0	0	0	0	0	0	0	0	0	0	0	0	16	0	0	0	0	0	0	0	0	0	0	0	0	0	3	0	5	0	0	1	0	0	0	0	0	0
Environmental Information Processing;Signal Transduction;VEGF signaling pathway	2	0	6	0	0	2	0	0	0	1	0	0	4	1	16	0	0	0	0	0	0	0	0	11	0	1	0	0	0	0	0	1	0	0	1	0	0	0	0	2	0	0	1	0	0	0	0	1	0
Environmental Information Processing;Signaling Molecules and Interaction;ECM-receptor interaction	3	8	0	0	0	0	0	0	0	17	0	0	0	0	0	0	0	0	18	0	0	4	0	0	0	0	0	0	0	0	0	0	0	0	0	0	0	0	0	0	0	0	0	0	0	0	0	0	0
Organismal Systems;Excretory System;Aldosterone-regulated sodium reabsorption	0	9	4	0	0	0	0	0	0	4	0	0	0	0	6	0	0	0	18	0	0	0	0	0	0	0	0	0	0	0	0	0	0	0	0	0	0	0	0	0	0	0	0	0	0	0	0	0	0
Genetic Information Processing;Transcription;Spliceosome	0	0	0	0	0	0	0	0	0	18	0	0	0	0	0	0	0	0	10	4	0	0	0	0	0	1	0	0	0	0	0	0	0	0	0	0	0	3	0	0	0	0	0	0	0	0	0	0	0
Human Diseases;Infectious Diseases;Leishmaniasis	2	0	6	0	0	2	0	0	0	1	0	0	4	1	0	0	0	0	0	0	0	0	0	11	0	1	0	0	0	0	0	1	0	0	1	0	0	0	0	2	0	0	1	0	0	0	0	1	0
Organismal Systems;Digestive System;Gastric acid secretion	0	0	2	0	0	0	0	0	0	4	0	0	0	0	6	0	0	0	18	0	0	0	0	0	0	0	0	0	0	0	0	0	0	0	0	0	0	0	0	0	0	0	0	0	0	0	0	0	0
Organismal Systems;Digestive System;Salivary secretion	0	0	2	0	0	0	0	0	0	4	0	0	0	0	6	0	0	0	18	0	0	0	0	0	0	0	0	0	0	0	0	0	0	0	0	0	0	0	0	0	0	0	0	0	0	0	0	0	0
Organismal Systems;Excretory System;Endocrine and other factor-regulated calcium reabsorption	0	0	2	0	0	0	0	0	0	4	0	0	0	0	6	0	0	0	18	0	0	0	0	0	0	0	0	0	0	0	0	0	0	0	0	0	0	0	0	0	0	0	0	0	0	0	0	0	0
Environmental Information Processing;Signal Transduction;MAPK signaling pathway	0	0	0	0	0	0	0	0	0	0	0	0	0	0	16	0	0	0	0	0	0	0	0	0	0	0	0	0	0	0	0	0	0	0	0	0	0	0	0	0	0	0	0	0	0	0	0	0	0
Organismal Systems;Circulatory System;Vascular smooth muscle contraction	0	0	0	0	0	0	0	0	0	0	0	0	0	0	16	0	0	0	0	0	0	0	0	0	0	0	0	0	0	0	0	0	0	0	0	0	0	0	0	0	0	0	0	0	0	0	0	0	0
Organismal Systems;Immune System;Fc epsilon RI signaling pathway	0	0	0	0	0	0	0	0	0	0	0	0	0	0	16	0	0	0	0	0	0	0	0	0	0	0	0	0	0	0	0	0	0	0	0	0	0	0	0	0	0	0	0	0	0	0	0	0	0
Organismal Systems;Nervous System;Long-term depression	0	0	0	0	0	0	0	0	0	0	0	0	0	0	16	0	0	0	0	0	0	0	0	0	0	0	0	0	0	0	0	0	0	0	0	0	0	0	0	0	0	0	0	0	0	0	0	0	0
Environmental Information Processing;Signal Transduction;Hedgehog signaling pathway	12	0	0	0	0	0	0	0	0	0	0	0	0	0	0	0	0	0	0	0	0	0	0	0	0	0	0	0	0	0	0	0	0	0	0	0	0	0	0	0	0	0	0	0	0	0	0	0	0
Environmental Information Processing;Signaling Molecules and Interaction;GTP-binding proteins	12	0	0	0	0	0	0	0	0	0	0	0	0	0	0	0	0	0	0	0	0	0	0	0	0	0	0	0	0	0	0	0	0	0	0	0	0	0	0	0	0	0	0	0	0	0	0	0	0
Organismal Systems;Immune System;Complement and coagulation cascades	0	0	0	0	0	12	0	0	0	0	0	0	0	0	0	0	0	0	0	0	0	0	0	0	0	0	0	0	0	0	0	0	0	0	0	0	0	0	0	0	0	0	0	0	0	0	0	0	0
Environmental Information Processing;Signaling Molecules and Interaction;Cytokine receptors	0	0	2	0	0	0	0	0	0	0	0	0	0	0	0	0	4	0	0	0	0	0	0	1	0	0	0	0	0	0	0	0	0	0	0	0	0	0	0	2	0	1	0	0	0	0	0	0	0
Environmental Information Processing;Signaling Molecules and Interaction;Cytokine-cytokine receptor interaction	0	0	2	0	0	0	0	0	0	0	0	0	0	0	0	0	4	0	0	0	0	0	0	1	0	0	0	0	0	0	0	0	0	0	0	0	0	0	0	2	0	1	0	0	0	0	0	0	0
Metabolism;Glycan Biosynthesis and Metabolism;Glycosaminoglycan biosynthesis - chondroitin sulfate	0	0	0	0	0	0	0	0	0	0	0	0	0	0	0	6	0	0	0	0	0	0	0	0	0	0	0	0	0	0	0	0	0	0	0	0	0	0	0	0	0	0	0	0	0	0	0	0	0
Cellular Processes;Cell Growth and Death;Cell cycle	0	0	0	0	0	0	0	0	0	0	0	0	0	0	0	0	0	0	0	0	0	0	0	0	0	0	0	0	0	0	0	0	0	0	0	0	0	0	0	0	0	0	0	0	0	0	0	0	0
Cellular Processes;Cell Growth and Death;Cell cycle - yeast	0	0	0	0	0	0	0	0	0	0	0	0	0	0	0	0	0	0	0	0	0	0	0	0	0	0	0	0	0	0	0	0	0	0	0	0	0	0	0	0	0	0	0	0	0	0	0	0	0
Cellular Processes;Cell Growth and Death;Oocyte meiosis	0	0	0	0	0	0	0	0	0	0	0	0	0	0	0	0	0	0	0	0	0	0	0	0	0	0	0	0	0	0	0	0	0	0	0	0	0	0	0	0	0	0	0	0	0	0	0	0	0
Environmental Information Processing;Signal Transduction;ErbB signaling pathway	0	0	0	0	0	0	0	0	0	0	0	0	0	0	0	0	0	0	0	0	0	0	0	0	0	0	0	0	0	0	0	0	0	0	0	0	0	0	0	0	0	0	0	0	0	0	0	0	0
Environmental Information Processing;Signal Transduction;TGF-beta signaling pathway	0	0	0	0	0	0	0	0	0	0	0	0	0	0	0	0	0	0	0	0	0	0	0	0	0	0	0	0	0	0	0	0	0	0	0	0	0	0	0	0	0	0	0	0	0	0	0	0	0
Environmental Information Processing;Signal Transduction;mTOR signaling pathway	0	0	0	0	0	0	0	0	0	0	0	0	0	0	0	0	0	0	0	0	0	0	0	0	0	0	0	0	0	0	0	0	0	0	0	0	0	0	0	0	0	0	0	0	0	0	0	0	0
Human Diseases;Cancers;Glioma	0	0	0	0	0	0	0	0	0	0	0	0	0	0	0	0	0	0	0	0	0	0	0	0	0	0	0	0	0	0	0	0	0	0	0	0	0	0	0	0	0	0	0	0	0	0	0	0	0
Human Diseases;Cancers;Pancreatic cancer	0	0	0	0	0	0	0	0	0	0	0	0	0	0	0	0	0	0	0	0	0	0	0	0	0	0	0	0	0	0	0	0	0	0	0	0	0	0	0	0	0	0	0	0	0	0	0	0	0
Human Diseases;Immune System Diseases;Rheumatoid arthritis	0	0	0	0	0	0	0	0	0	0	0	0	0	0	0	0	0	0	0	0	0	0	0	0	0	0	0	0	0	0	0	0	0	0	0	0	0	0	0	0	0	0	0	0	0	0	0	0	0
Human Diseases;Infectious Diseases;Hepatitis C	0	0	0	0	0	0	0	0	0	0	0	0	0	0	0	0	0	0	0	0	0	0	0	0	0	0	0	0	0	0	0	0	0	0	0	0	0	0	0	0	0	0	0	0	0	0	0	0	0
Human Diseases;Infectious Diseases;Measles	0	0	0	0	0	0	0	0	0	0	0	0	0	0	0	0	0	0	0	0	0	0	0	0	0	0	0	0	0	0	0	0	0	0	0	0	0	0	0	0	0	0	0	0	0	0	0	0	0
Metabolism;Glycan Biosynthesis and Metabolism;Other types of O-glycan biosynthesis	0	0	0	0	0	0	0	0	0	0	0	0	0	0	0	0	0	0	0	0	0	0	0	0	0	0	0	0	0	0	0	0	0	0	0	0	0	0	0	0	0	0	0	0	0	0	0	0	0
Organismal Systems;Immune System;Cytosolic DNA-sensing pathway	0	0	0	0	0	0	0	0	0	0	0	0	0	0	0	0	0	0	0	0	0	0	0	0	0	0	0	0	0	0	0	0	0	0	0	0	0	0	0	0	0	0	0	0	0	0	0	0	0
Organismal Systems;Nervous System;Cholinergic synapse	0	0	0	0	0	0	0	0	0	0	0	0	0	0	0	0	0	0	0	0	0	0	0	0	0	0	0	0	0	0	0	0	0	0	0	0	0	0	0	0	0	0	0	0	0	0	0	0	0
Organismal Systems;Nervous System;Long-term potentiation	0	0	0	0	0	0	0	0	0	0	0	0	0	0	0	0	0	0	0	0	0	0	0	0	0	0	0	0	0	0	0	0	0	0	0	0	0	0	0	0	0	0	0	0	0	0	0	0	0
Organismal Systems;Nervous System;Neurotrophin signaling pathway	0	0	0	0	0	0	0	0	0	0	0	0	0	0	0	0	0	0	0	0	0	0	0	0	0	0	0	0	0	0	0	0	0	0	0	0	0	0	0	0	0	0	0	0	0	0	0	0	0
Organismal Systems;Sensory System;Olfactory transduction	0	0	0	0	0	0	0	0	0	0	0	0	0	0	0	0	0	0	0	0	0	0	0	0	0	0	0	0	0	0	0	0	0	0	0	0	0	0	0	0	0	0	0	0	0	0	0	0	0
Organismal Systems;Sensory System;Phototransduction	0	0	0	0	0	0	0	0	0	0	0	0	0	0	0	0	0	0	0	0	0	0	0	0	0	0	0	0	0	0	0	0	0	0	0	0	0	0	0	0	0	0	0	0	0	0	0	0	0
[truncated: 4 more columns]
